# Supplementary material for: Persistent cross-species transmission systems dominate Shiga toxin-producing Escherichia coli O157:H7 epidemiology in a high incidence region: A genomic epidemiology study
Source: eLife. 2025 Jan 29;13:RP97643. doi: 10.7554/eLife.97643 (PMC11778926; doi:10.7554/eLife.97643)
Supplement: Source data 1. [file elife-97643-data1.xlsx]

## Sheet: Data
Accession Number	Analysis Set	Locale	Year	Sampling Date	Species	Clade	stx Profile
SAMN30378673	Primary Alberta	Alberta	2015	1/15/2015	Cattle	G(vi)	stx2a
SAMN30378674	Primary Alberta	Alberta	2015	1/15/2015	Cattle	F	stx2a,stx2c
SAMN30378675	Primary Alberta	Alberta	2015	1/15/2015	Cattle	G(vi)	stx1a,stx2a
SAMN30378748	Primary Alberta	Alberta	2015	2/15/2015	Cattle	G(vi)	stx1a,stx2a
SAMN30378747	Primary Alberta	Alberta	2015	2/15/2015	Cattle	G(vi)	stx1a,stx2a
SAMN30378676	Primary Alberta	Alberta	2015	2/15/2015	Cattle	G(vi)	stx1a,stx2a
SAMN30378749	Primary Alberta	Alberta	2015	2/15/2015	Cattle	G(vi)	stx1a,stx2a
SAMN30378750	Primary Alberta	Alberta	2015	2/15/2015	Cattle	G(vi)	stx1a,stx2a
SAMN39734885	Extended Alberta	Alberta	2009	*	Human	G(vi)	stx1a,stx2a
SAMN39734886	Extended Alberta	Alberta	2009	*	Human	G(vi)	stx1a,stx2a
SAMN39734887	Extended Alberta	Alberta	2010	*	Human	G(vi)	stx1a,stx2a
SAMN39734888	Extended Alberta	Alberta	2010	*	Human	G(vi)	stx1a,stx2a
SAMN39734889	Extended Alberta	Alberta	2010	*	Human	G(vi)	stx1a,stx2a
SAMN39734890	Extended Alberta	Alberta	2010	*	Human	G(vi)	stx1a,stx2a
SAMN30378678	Primary Alberta	Alberta	2014	3/15/2014	Cattle	G(vi)	stx1a,stx2a
SAMN39734891	Extended Alberta	Alberta	2011	*	Human	G(vi)	stx1a,stx2a
SAMN39734892	Extended Alberta	Alberta	2011	*	Human	G(vi)	stx1a,stx2a
SAMN39734893	Extended Alberta	Alberta	2011	*	Human	G(vi)	stx1a,stx2a
SAMN39734894	Extended Alberta	Alberta	2011	*	Human	G(vi)	stx1a,stx2a
SAMN39734895	Extended Alberta	Alberta	2011	*	Human	G(vi)	stx2a
SAMN39734896	Extended Alberta	Alberta	2011	*	Human	G(vi)	stx1a,stx2a
SAMN39734897	Extended Alberta	Alberta	2011	*	Human	A	stx2c
SAMN39734898	Extended Alberta	Alberta	2011	*	Human	G(vi)	stx2a
SAMN39734899	Extended Alberta	Alberta	2011	*	Human	G(vi)	stx1a,stx2a
SAMN39734900	Extended Alberta	Alberta	2011	*	Human	G(vi)	stx1a,stx2a
SAMN39734901	Extended Alberta	Alberta	2012	*	Human	G(vi)	stx1a,stx2a
SAMN39734902	Extended Alberta	Alberta	2012	*	Human	G(vi)	stx2a
SAMN39734903	Extended Alberta	Alberta	2012	*	Human	G(vi)	stx1a,stx2a
SAMN39734904	Extended Alberta	Alberta	2012	*	Human	G(vi)	stx1a,stx2a
SAMN39734905	Extended Alberta	Alberta	2012	*	Human	G(vi)	stx1a,stx2a
SAMN39734906	Extended Alberta	Alberta	2012	*	Human	G(vi)	stx1a,stx2a
SAMN39734907	Extended Alberta	Alberta	2012	*	Human	G(vi)	stx1a,stx2a
SAMN30378679	Primary Alberta	Alberta	2014	3/15/2014	Cattle	G(vi)	stx1a,stx2a
SAMN30378680	Primary Alberta	Alberta	2015	3/15/2015	Cattle	G(vi)	stx1a,stx2a
SAMN30378752	Primary Alberta	Alberta	2015	3/15/2015	Cattle	G(vi)	stx1a,stx2a
SAMN30378681	Primary Alberta	Alberta	2015	3/15/2015	Cattle	G(vi)	stx1a,stx2a
SAMN30378753	Primary Alberta	Alberta	2015	3/15/2015	Cattle	F	stx2a,stx2c
SAMN39734908	Extended Alberta	Alberta	2014	*	Human	G(vi)	stx2a
SAMN39734909	Extended Alberta	Alberta	2014	*	Human	G(vi)	stx2a
SAMN39734910	Extended Alberta	Alberta	2014	*	Human	G(vi)	stx2a
SAMN39734911	Extended Alberta	Alberta	2014	*	Human	G(vi)	stx2a
SAMN39734912	Extended Alberta	Alberta	2014	*	Human	G(vi)	stx1a,stx2a
SAMN39734913	Extended Alberta	Alberta	2014	*	Human	G(vi)	stx1a,stx2a
SAMN39734914	Extended Alberta	Alberta	2014	*	Human	G(vi)	stx1a,stx2a
SAMN39734915	Extended Alberta	Alberta	2014	*	Human	G(vi)	stx2a
SAMN39734916	Extended Alberta	Alberta	2014	*	Human	G(vi)	stx2a
SAMN39734917	Extended Alberta	Alberta	2014	*	Human	G(vi)	stx1a,stx2a
SAMN39734918	Extended Alberta	Alberta	2014	*	Human	G(vi)	stx1a,stx2a
SAMN39734919	Extended Alberta	Alberta	2014	*	Human	G(vi)	stx2a
SAMN39734920	Extended Alberta	Alberta	2014	*	Human	G(vi)	stx1a,stx2a
SAMN39734921	Extended Alberta	Alberta	2014	*	Human	G(vi)	stx2a
SAMN39734922	Extended Alberta	Alberta	2014	*	Human	G(vi)	stx2a
SAMN39734923	Extended Alberta	Alberta	2014	*	Human	G(vi)	stx1a,stx2a
SAMN39734924	Extended Alberta	Alberta	2014	*	Human	G(vi)	stx1a,stx2a
SAMN39734925	Extended Alberta	Alberta	2014	*	Human	G(vi)	stx1a,stx2a
SAMN39734926	Extended Alberta	Alberta	2014	*	Human	G(vi)	stx1a,stx2a
SAMN39734927	Extended Alberta	Alberta	2014	*	Human	G(vi)	stx1a,stx2a
SAMN39734928	Extended Alberta	Alberta	2014	*	Human	G(vi)	stx1a,stx2a
SAMN39734929	Extended Alberta	Alberta	2014	*	Human	G(vi)	stx1a,stx2a
SAMN39734930	Extended Alberta	Alberta	2014	*	Human	G(vi)	stx1a,stx2a
SAMN39734931	Extended Alberta	Alberta	2014	*	Human	G(vi)	stx1a,stx2a
SAMN39734932	Extended Alberta	Alberta	2014	*	Human	G(vi)	stx1a,stx2a
SAMN39734933	Extended Alberta	Alberta	2014	*	Human	G(vi)	stx1a,stx2a
SAMN39734934	Extended Alberta	Alberta	2014	*	Human	G(vi)	stx1a,stx2a
SAMN39734935	Extended Alberta	Alberta	2014	*	Human	G(vi)	stx1a,stx2a
SAMN39734936	Extended Alberta	Alberta	2014	*	Human	G(vi)	stx1a,stx2a
SAMN39734937	Extended Alberta	Alberta	2014	*	Human	G(vi)	stx1a,stx2a
SAMN39734938	Extended Alberta	Alberta	2014	*	Human	G(vi)	stx1a,stx2a
SAMN39734939	Extended Alberta	Alberta	2014	*	Human	G(vi)	stx1a,stx2a
SAMN39734940	Extended Alberta	Alberta	2014	*	Human	G(vi)	stx1a,stx2a
SAMN39734941	Extended Alberta	Alberta	2014	*	Human	G(vi)	stx2a
SAMN39734942	Extended Alberta	Alberta	2014	*	Human	G(vi)	stx1a,stx2a
SAMN39734943	Extended Alberta	Alberta	2014	*	Human	G(vi)	stx1a,stx2a
SAMN39734944	Extended Alberta	Alberta	2014	*	Human	G(vi)	stx1a,stx2a
SAMN39734945	Extended Alberta	Alberta	2014	*	Human	G(vi)	stx1a,stx2a
SAMN39734946	Extended Alberta	Alberta	2014	*	Human	G(vi)	stx1a,stx2a
SAMN39734947	Extended Alberta	Alberta	2014	*	Human	G(vi)	stx1a,stx2a
SAMN39734948	Extended Alberta	Alberta	2014	*	Human	G(vi)	stx1a,stx2a
SAMN39734949	Extended Alberta	Alberta	2014	*	Human	G(vi)	stx1a,stx2a
SAMN39734950	Extended Alberta	Alberta	2014	*	Human	G(vi)	stx1a,stx2a
SAMN39734951	Extended Alberta	Alberta	2014	*	Human	G(vi)	stx1a,stx2a
SAMN39734952	Extended Alberta	Alberta	2014	*	Human	G(vi)	stx1a,stx2a
SAMN39734953	Extended Alberta	Alberta	2014	*	Human	G(vi)	stx1a,stx2a
SAMN39734954	Extended Alberta	Alberta	2014	*	Human	G(vi)	stx1a,stx2a
SAMN39734955	Extended Alberta	Alberta	2014	*	Human	G(vi)	stx1a,stx2a
SAMN39734956	Extended Alberta	Alberta	2014	*	Human	G(vi)	stx1a,stx2a
SAMN39734957	Extended Alberta	Alberta	2014	*	Human	G(vi)	stx1a,stx2a
SAMN39734958	Extended Alberta	Alberta	2014	*	Human	G(vi)	stx1a,stx2a
SAMN39734959	Extended Alberta	Alberta	2014	*	Human	G(vi)	stx1a,stx2a
SAMN39734960	Extended Alberta	Alberta	2014	*	Human	G(vi)	stx1a,stx2a
SAMN39734961	Extended Alberta	Alberta	2014	*	Human	G(vi)	stx1a,stx2a
SAMN39734962	Extended Alberta	Alberta	2014	*	Human	G(vi)	stx1a,stx2a
SAMN39734963	Extended Alberta	Alberta	2014	*	Human	G(vi)	stx1a,stx2a
SAMN39734964	Extended Alberta	Alberta	2014	*	Human	G(vi)	stx1a,stx2a
SAMN39734965	Extended Alberta	Alberta	2014	*	Human	G(vi)	stx1a,stx2a
SAMN39734966	Extended Alberta	Alberta	2014	*	Human	G(vi)	stx1a,stx2a
SAMN39734967	Extended Alberta	Alberta	2014	*	Human	G(vi)	stx1a,stx2a
SAMN39734968	Extended Alberta	Alberta	2014	*	Human	G(vi)	stx1a,stx2a
SAMN39734969	Extended Alberta	Alberta	2014	*	Human	G(vi)	stx1a,stx2a
SAMN39734970	Extended Alberta	Alberta	2014	*	Human	G(vi)	stx1a,stx2a
SAMN39734971	Extended Alberta	Alberta	2014	*	Human	G(vi)	stx1a,stx2a
SAMN39734972	Extended Alberta	Alberta	2014	*	Human	G(vi)	stx1a,stx2a
SAMN39734973	Extended Alberta	Alberta	2014	*	Human	G(vi)	stx1a,stx2a
SAMN39734974	Extended Alberta	Alberta	2014	*	Human	G(vi)	stx1a,stx2a
SAMN39734975	Extended Alberta	Alberta	2014	*	Human	G(vi)	stx1a,stx2a
SAMN39734976	Extended Alberta	Alberta	2014	*	Human	G(vi)	stx1a,stx2a
SAMN39734977	Extended Alberta	Alberta	2014	*	Human	G(vi)	stx1a,stx2a
SAMN39734978	Extended Alberta	Alberta	2014	*	Human	G(vi)	stx1a,stx2a
SAMN39734979	Extended Alberta	Alberta	2014	*	Human	G(vi)	stx1a,stx2a
SAMN39734980	Extended Alberta	Alberta	2014	*	Human	G(vi)	stx1a,stx2a
SAMN39734981	Extended Alberta	Alberta	2014	*	Human	G(vi)	stx1a,stx2a
SAMN39734982	Extended Alberta	Alberta	2014	*	Human	G(vi)	stx1a,stx2a
SAMN39734983	Extended Alberta	Alberta	2014	*	Human	G	stx2c
SAMN39734984	Extended Alberta	Alberta	2014	*	Human	G(vi)	stx1a,stx2a
SAMN39734985	Extended Alberta	Alberta	2014	*	Human	G(vi)	stx1a,stx2a
SAMN39734986	Extended Alberta	Alberta	2014	*	Human	G(vi)	stx1a,stx2a
SAMN39734987	Extended Alberta	Alberta	2014	*	Human	G(vi)	stx1a,stx2a
SAMN39734988	Extended Alberta	Alberta	2014	*	Human	G(vi)	stx1a,stx2a
SAMN39734989	Extended Alberta	Alberta	2014	*	Human	G(vi)	stx1a,stx2a
SAMN39734990	Extended Alberta	Alberta	2014	*	Human	G(vi)	stx1a,stx2a
SAMN39734991	Extended Alberta	Alberta	2014	*	Human	G(vi)	stx1a,stx2a
SAMN39734992	Extended Alberta	Alberta	2014	*	Human	G(vi)	stx1a,stx2a
SAMN39734993	Extended Alberta	Alberta	2014	*	Human	G(vi)	stx1a,stx2a
SAMN39734994	Extended Alberta	Alberta	2014	*	Human	G(vi)	stx1a,stx2a
SAMN39734995	Extended Alberta	Alberta	2014	*	Human	G(vi)	stx1a,stx2a
SAMN39734996	Extended Alberta	Alberta	2014	*	Human	G(vi)	stx1a,stx2a
SAMN39734997	Extended Alberta	Alberta	2014	*	Human	G(vi)	stx1a,stx2a
SAMN39734998	Extended Alberta	Alberta	2014	*	Human	G(vi)	stx1a,stx2a
SAMN39734999	Extended Alberta	Alberta	2014	*	Human	G(vi)	stx1a,stx2a
SAMN39735000	Extended Alberta	Alberta	2014	*	Human	G(vi)	stx1a,stx2a
SAMN39735001	Extended Alberta	Alberta	2014	*	Human	G(vi)	stx1a,stx2a
SAMN39735002	Extended Alberta	Alberta	2014	*	Human	G(vi)	stx1a,stx2a
SAMN39735003	Extended Alberta	Alberta	2014	*	Human	G(vi)	stx1a,stx2a
SAMN39735004	Extended Alberta	Alberta	2014	*	Human	G(vi)	stx1a,stx2a
SAMN39735005	Extended Alberta	Alberta	2014	*	Human	G(vi)	stx1a,stx2a
SAMN39735006	Extended Alberta	Alberta	2014	*	Human	G(vi)	stx1a,stx2a
SAMN39735007	Extended Alberta	Alberta	2014	*	Human	G(vi)	stx1a,stx2a
SAMN39735008	Extended Alberta	Alberta	2014	*	Human	G(vi)	stx1a,stx2a
SAMN39735009	Extended Alberta	Alberta	2014	*	Human	G(vi)	stx1a,stx2a
SAMN39735010	Extended Alberta	Alberta	2014	*	Human	G(vi)	stx1a,stx2a
SAMN39735011	Extended Alberta	Alberta	2014	*	Human	G(vi)	stx1a,stx2a
SAMN39735012	Extended Alberta	Alberta	2014	*	Human	G(vi)	stx1a,stx2a
SAMN39735013	Extended Alberta	Alberta	2014	*	Human	G(vi)	stx1a,stx2a
SAMN39735014	Extended Alberta	Alberta	2014	*	Human	G(vi)	stx1a,stx2a
SAMN39735015	Extended Alberta	Alberta	2014	*	Human	G(vi)	stx1a,stx2a
SAMN39735016	Extended Alberta	Alberta	2014	*	Human	G(vi)	stx1a,stx2a
SAMN39735017	Extended Alberta	Alberta	2014	*	Human	G(vi)	stx1a,stx2a
SAMN39735018	Extended Alberta	Alberta	2014	*	Human	G(vi)	stx1a,stx2a
SAMN39735019	Extended Alberta	Alberta	2014	*	Human	G(vi)	stx1a,stx2a
SAMN39735020	Extended Alberta	Alberta	2014	*	Human	G(vi)	stx1a,stx2a
SAMN39735021	Extended Alberta	Alberta	2014	*	Human	G(vi)	stx1a,stx2a
SAMN39735022	Extended Alberta	Alberta	2014	*	Human	G(vi)	stx1a,stx2a
SAMN39735023	Extended Alberta	Alberta	2014	*	Human	G(vi)	stx1a,stx2a
SAMN39735024	Extended Alberta	Alberta	2014	*	Human	G(vi)	stx1a,stx2a
SAMN39735025	Extended Alberta	Alberta	2014	*	Human	G(vi)	stx1a,stx2a
SAMN39735026	Extended Alberta	Alberta	2014	*	Human	G(vi)	stx1a,stx2a
SAMN39735027	Extended Alberta	Alberta	2014	*	Human	G(vi)	stx1a,stx2a
SAMN39735028	Extended Alberta	Alberta	2014	*	Human	G(vi)	stx1a,stx2a
SAMN39735029	Extended Alberta	Alberta	2014	*	Human	G(vi)	stx1a,stx2a
SAMN39735030	Extended Alberta	Alberta	2014	*	Human	G(vi)	stx1a,stx2a
SAMN39734879	Extended Alberta	Alberta	2014	*	Human	G(vi)	stx1a,stx2a
SAMN39735031	Extended Alberta	Alberta	2014	*	Human	G(vi)	stx1a,stx2a
SAMN39734880	Extended Alberta	Alberta	2014	*	Human	G(vi)	stx1a,stx2a
SAMN39735032	Extended Alberta	Alberta	2014	*	Human	G(vi)	stx1a,stx2a
SAMN39735033	Extended Alberta	Alberta	2014	*	Human	G(vi)	stx1a,stx2a
SAMN39735034	Extended Alberta	Alberta	2015	*	Human	F	stx2a
SAMN39735035	Extended Alberta	Alberta	2015	*	Human	G(vi)	stx1a,stx2a
SAMN39735036	Extended Alberta	Alberta	2015	*	Human	G	stx1a,stx2c
SAMN39735037	Extended Alberta	Alberta	2015	*	Human	E	stx2c
SAMN39735038	Extended Alberta	Alberta	2015	*	Human	G(vi)	stx1a,stx2a
SAMN39735041	Extended Alberta	Alberta	2015	*	Human	A	stx1a,stx2c
SAMN39735042	Extended Alberta	Alberta	2015	*	Human	G(vi)	stx2a
SAMN39735043	Extended Alberta	Alberta	2015	*	Human	F	stx2a,stx2c
SAMN39735044	Extended Alberta	Alberta	2015	*	Human	F	stx2c
SAMN39735045	Extended Alberta	Alberta	2015	*	Human	F	stx2c
SAMN39735046	Extended Alberta	Alberta	2015	*	Human	F	stx2a,stx2c
SAMN39735047	Extended Alberta	Alberta	2015	*	Human	F	stx2c
SAMN39735048	Extended Alberta	Alberta	2015	*	Human	F	stx2c
SAMN39735049	Extended Alberta	Alberta	2015	*	Human	F	stx2a
SAMN39735050	Extended Alberta	Alberta	2015	*	Human	F	stx2a,stx2c
SAMN30378682	Primary Alberta	Alberta	2014	4/15/2014	Cattle	G(vi)	stx2a
SAMN30378684	Primary Alberta	Alberta	2014	4/15/2014	Cattle	G(vi)	stx2a
SAMN30378754	Primary Alberta	Alberta	2014	4/15/2014	Cattle	G(vi)	stx1a,stx2a
SAMN30378683	Primary Alberta	Alberta	2014	4/15/2014	Cattle	G(vi)	stx2a
SAMN30378755	Primary Alberta	Alberta	2015	4/15/2015	Cattle	G(vi)	stx1a,stx2a
SAMN39735051	Extended Alberta	Alberta	2015	*	Human	F	stx2c
SAMN39735052	Extended Alberta	Alberta	2015	*	Human	G(vi)	stx1a,stx2a
SAMN39735053	Extended Alberta	Alberta	2015	*	Human	F	stx2c
SAMN39735054	Extended Alberta	Alberta	2015	*	Human	G(vi)	stx2a
SAMN39735055	Extended Alberta	Alberta	2015	*	Human	G(vi)	stx1a,stx2a
SAMN30378672	Primary Alberta	Alberta	2010	10/15/2010	Cattle	G(vi)	stx1a,stx2a
SAMN39735056	Extended Alberta	Alberta	2015	*	Human	G(vi)	stx1a,stx2a
SAMN39735057	Extended Alberta	Alberta	2015	*	Human	G(vi)	stx1a,stx2a
SAMN39735058	Extended Alberta	Alberta	2015	*	Human	G(vi)	stx1a,stx2a
SAMN39735059	Extended Alberta	Alberta	2015	*	Human	G(vi)	stx1a,stx2a
SAMN39735060	Extended Alberta	Alberta	2015	*	Human	G(vi)	stx1a,stx2a
SAMN39735061	Extended Alberta	Alberta	2015	*	Human	G(vi)	stx1a,stx2a
SAMN39735062	Extended Alberta	Alberta	2015	*	Human	G(vi)	stx1a,stx2a
SAMN39735063	Extended Alberta	Alberta	2015	*	Human	G(vi)	stx1a,stx2a
SAMN39735064	Extended Alberta	Alberta	2015	*	Human	G(vi)	stx1a,stx2a
SAMN39735065	Extended Alberta	Alberta	2015	*	Human	G(vi)	stx1a,stx2a
SAMN39735066	Extended Alberta	Alberta	2015	*	Human	G(vi)	stx1a,stx2a
SAMN39735067	Extended Alberta	Alberta	2015	*	Human	G(vi)	stx1a,stx2a
SAMN39735068	Extended Alberta	Alberta	2016	*	Human	G(vi)	stx1a,stx2a
SAMN39735069	Extended Alberta	Alberta	2016	*	Human	G(vi)	stx1a,stx2a
SAMN39735070	Extended Alberta	Alberta	2016	*	Human	G(vi)	stx1a,stx2a
SAMN39735071	Extended Alberta	Alberta	2016	*	Human	G(vi)	stx1a,stx2a
SAMN39735072	Extended Alberta	Alberta	2016	*	Human	G(vi)	stx1a,stx2a
SAMN39735073	Extended Alberta	Alberta	2016	*	Human	G(vi)	stx1a,stx2a
SAMN39735074	Extended Alberta	Alberta	2016	*	Human	G(vi)	stx1a,stx2a
SAMN39735075	Extended Alberta	Alberta	2016	*	Human	G(vi)	stx1a,stx2a
SAMN39734882	Extended Alberta	Alberta	2016	*	Human	G(vi)	stx1a,stx2a
SAMN39735076	Extended Alberta	Alberta	2016	*	Human	G(vi)	stx1a,stx2a
SAMN39734883	Extended Alberta	Alberta	2016	*	Human	G(vi)	stx1a,stx2a
SAMN39735077	Extended Alberta	Alberta	2016	*	Human	D	stx1a,stx2c
SAMN39735078	Extended Alberta	Alberta	2016	*	Human	G(vi)	stx1a,stx2a
SAMN39735079	Extended Alberta	Alberta	2016	*	Human	G(vi)	stx2a
SAMN39735080	Extended Alberta	Alberta	2016	*	Human	G(vi)	stx1a,stx2a
SAMN39735081	Extended Alberta	Alberta	2016	*	Human	G(vi)	stx1a,stx2a
SAMN39735082	Extended Alberta	Alberta	2016	*	Human	G(vi)	stx1a,stx2a
SAMN30378756	Primary Alberta	Alberta	2011	1/15/2011	Cattle	G(vi)	stx1a,stx2a
SAMN39735083	Extended Alberta	Alberta	2016	*	Human	G(vi)	stx1a,stx2a
SAMN39735084	Extended Alberta	Alberta	2016	*	Human	G(vi)	stx2a
SAMN39735085	Extended Alberta	Alberta	2016	*	Human	G(vi)	stx2a
SAMN39735086	Extended Alberta	Alberta	2016	*	Human	G(vi)	stx2a
SAMN30378686	Primary Alberta	Alberta	2015	4/15/2015	Cattle	G(vi)	stx1a,stx2a
SAMN39735087	Extended Alberta	Alberta	2017	*	Human	G(vi)	stx1a,stx2a
SAMN39735088	Extended Alberta	Alberta	2017	*	Human	G(vi)	stx2a
SAMN39735089	Extended Alberta	Alberta	2017	*	Human	G(vi)	stx2a
SAMN39735090	Extended Alberta	Alberta	2017	*	Human	G(vi)	stx2a
SAMN39735091	Extended Alberta	Alberta	2017	*	Human	G(vi)	stx2a
SAMN39735092	Extended Alberta	Alberta	2017	*	Human	G(vi)	stx2a
SAMN39735093	Extended Alberta	Alberta	2017	*	Human	G(vi)	stx2a
SAMN39735094	Extended Alberta	Alberta	2017	*	Human	G(vi)	stx2a
SAMN39735095	Extended Alberta	Alberta	2017	*	Human	G(vi)	stx1a,stx2a
SAMN39735096	Extended Alberta	Alberta	2018	*	Human	G(vi)	stx1a,stx2a
SAMN39735098	Extended Alberta	Alberta	2018	*	Human	G(vi)	stx1a,stx2a
SAMN39735099	Extended Alberta	Alberta	2018	*	Human	F	stx2a
SAMN39735100	Extended Alberta	Alberta	2018	*	Human	E	stx2c
SAMN39735101	Extended Alberta	Alberta	2018	*	Human	G(vi)	stx2a
SAMN39735102	Extended Alberta	Alberta	2018	*	Human	G(vi)	stx2a
SAMN39735103	Extended Alberta	Alberta	2018	*	Human	G(vi)	stx2a
SAMN39735104	Extended Alberta	Alberta	2018	*	Human	G(vi)	stx2a
SAMN39735105	Extended Alberta	Alberta	2018	*	Human	G(vi)	stx2a
SAMN39735106	Extended Alberta	Alberta	2018	*	Human	G(vi)	stx2a
SAMN39735107	Extended Alberta	Alberta	2018	*	Human	G(vi)	stx2a
SAMN39735108	Extended Alberta	Alberta	2018	*	Human	G(vi)	stx2a
SAMN39735109	Extended Alberta	Alberta	2018	*	Human	G(vi)	stx2a
SAMN39735110	Extended Alberta	Alberta	2018	*	Human	G(vi)	stx2a
SAMN39735111	Extended Alberta	Alberta	2018	*	Human	G(vi)	stx2a
SAMN39735112	Extended Alberta	Alberta	2018	*	Human	G(vi)	stx2a
SAMN39735113	Extended Alberta	Alberta	2018	*	Human	G(vi)	stx2a
SAMN39735114	Extended Alberta	Alberta	2018	*	Human	G(vi)	stx2a
SAMN39735115	Extended Alberta	Alberta	2018	*	Human	G(vi)	stx2a
SAMN39735116	Extended Alberta	Alberta	2018	*	Human	G(vi)	stx2a
SAMN39735117	Extended Alberta	Alberta	2018	*	Human	G(vi)	stx2a
SAMN39735118	Extended Alberta	Alberta	2018	*	Human	G(vi)	stx2a
SAMN39735119	Extended Alberta	Alberta	2018	*	Human	G(vi)	stx2a
SAMN39735120	Extended Alberta	Alberta	2018	*	Human	G(vi)	stx2a
SAMN39735121	Extended Alberta	Alberta	2018	*	Human	G(vi)	stx2a
SAMN39735122	Extended Alberta	Alberta	2018	*	Human	G(vi)	stx2a
SAMN39735123	Extended Alberta	Alberta	2018	*	Human	G(vi)	stx2a
SAMN39735124	Extended Alberta	Alberta	2018	*	Human	G(vi)	stx2a
SAMN39735125	Extended Alberta	Alberta	2018	*	Human	G(vi)	stx2a
SAMN39735126	Extended Alberta	Alberta	2018	*	Human	G(vi)	stx2a
SAMN39735127	Extended Alberta	Alberta	2018	*	Human	G(vi)	stx2a
SAMN39735128	Extended Alberta	Alberta	2018	*	Human	G(vi)	stx2a
SAMN39735129	Extended Alberta	Alberta	2018	*	Human	E	stx2c
SAMN39735130	Extended Alberta	Alberta	2018	*	Human	F	stx2a,stx2c
SAMN39735131	Extended Alberta	Alberta	2018	*	Human	G(vi)	stx2a
SAMN39735132	Extended Alberta	Alberta	2018	*	Human	G(vi)	stx2a
SAMN39735133	Extended Alberta	Alberta	2018	*	Human	G(vi)	stx2a
SAMN39735134	Extended Alberta	Alberta	2018	*	Human	G(vi)	stx2a
SAMN39735135	Extended Alberta	Alberta	2018	*	Human	G	stx2c
SAMN39735136	Extended Alberta	Alberta	2018	*	Human	G(vi)	stx2a
SAMN39734866	Extended Alberta	Alberta	2018	*	Human	G(vi)	stx2a
SAMN39734867	Extended Alberta	Alberta	2018	*	Human	G(vi)	stx2a
SAMN39735137	Extended Alberta	Alberta	2018	*	Human	G(vi)	stx1a,stx2a
SAMN39734868	Extended Alberta	Alberta	2018	*	Human	G(vi)	stx2a
SAMN39735138	Extended Alberta	Alberta	2018	*	Human	G(vi)	stx2a
SAMN39735139	Extended Alberta	Alberta	2018	*	Human	G(vi)	stx2a
SAMN39734869	Extended Alberta	Alberta	2018	*	Human	G(vi)	stx2a
SAMN39734870	Extended Alberta	Alberta	2018	*	Human	G(vi)	stx2a
SAMN39735140	Extended Alberta	Alberta	2018	*	Human	G	stx2c
SAMN39734871	Extended Alberta	Alberta	2018	*	Human	G(vi)	stx2a
SAMN39734872	Extended Alberta	Alberta	2018	*	Human	G(vi)	stx2a
SAMN39735141	Extended Alberta	Alberta	2018	*	Human	G	stx2c
SAMN39735142	Extended Alberta	Alberta	2018	*	Human	G(vi)	stx2a
SAMN39735143	Extended Alberta	Alberta	2018	*	Human	G(vi)	stx2a
SAMN39735144	Extended Alberta	Alberta	2018	*	Human	G	stx2c
SAMN39735145	Extended Alberta	Alberta	2018	*	Human	G(vi)	stx2a
SAMN39735146	Extended Alberta	Alberta	2018	*	Human	G	stx2c
SAMN39735147	Extended Alberta	Alberta	2018	*	Human	G	stx2a,stx2c
SAMN39734873	Extended Alberta	Alberta	2018	*	Human	G(vi)	stx2a
SAMN39734874	Extended Alberta	Alberta	2018	*	Human	G(vi)	stx2a
SAMN39735148	Extended Alberta	Alberta	2018	*	Human	G	stx2c
SAMN39735149	Extended Alberta	Alberta	2018	*	Human	D	stx1a,stx2c
SAMN39735150	Extended Alberta	Alberta	2018	*	Human	G(vi)	stx1a,stx2a
SAMN39735151	Extended Alberta	Alberta	2018	*	Human	G(vi)	stx1a,stx2a
SAMN39735152	Extended Alberta	Alberta	2018	*	Human	F	stx2c
SAMN39735153	Extended Alberta	Alberta	2018	*	Human	G(vi)	stx1a,stx2a
SAMN39735154	Extended Alberta	Alberta	2018	*	Human	G(vi)	stx1a,stx2a
SAMN39735155	Extended Alberta	Alberta	2018	*	Human	G(vi)	stx2a
SAMN39735156	Extended Alberta	Alberta	2018	*	Human	G(vi)	stx2a
SAMN39735157	Extended Alberta	Alberta	2018	*	Human	G(vi)	stx1a,stx2a
SAMN39735158	Extended Alberta	Alberta	2018	*	Human	C	stx1a,stx2c
SAMN39735159	Extended Alberta	Alberta	2018	*	Human	G(vi)	stx1a,stx2a
SAMN39735160	Extended Alberta	Alberta	2018	*	Human	G(vi)	stx2a
SAMN39735161	Extended Alberta	Alberta	2018	*	Human	G(vi)	stx1a,stx2a
SAMN39735162	Extended Alberta	Alberta	2018	*	Human	G(vi)	stx1a,stx2a
SAMN39735163	Extended Alberta	Alberta	2018	*	Human	G(vi)	stx1a,stx2a
SAMN39735164	Extended Alberta	Alberta	2018	*	Human	G(vi)	stx1a,stx2a
SAMN39735165	Extended Alberta	Alberta	2018	*	Human	G(vi)	stx1a,stx2a
SAMN39735166	Extended Alberta	Alberta	2018	*	Human	G(vi)	stx2a
SAMN39735167	Extended Alberta	Alberta	2018	*	Human	F	stx2a,stx2c
SAMN39735168	Extended Alberta	Alberta	2018	*	Human	G(vi)	stx2a
SAMN39735169	Extended Alberta	Alberta	2018	*	Human	G(vi)	stx1a,stx2a
SAMN39735170	Extended Alberta	Alberta	2018	*	Human	G(vi)	stx1a,stx2a
SAMN39735171	Extended Alberta	Alberta	2018	*	Human	F	stx2c
SAMN39735172	Extended Alberta	Alberta	2018	*	Human	G(vi)	stx1a,stx2a
SAMN39735173	Extended Alberta	Alberta	2018	*	Human	G(vi)	stx1a,stx2a
SAMN39735174	Extended Alberta	Alberta	2018	*	Human	G(vi)	stx1a,stx2a
SAMN39735175	Extended Alberta	Alberta	2018	*	Human	G(vi)	stx1a,stx2a
SAMN39735176	Extended Alberta	Alberta	2018	*	Human	G(vi)	stx1a,stx2a
SAMN39735177	Extended Alberta	Alberta	2018	*	Human	G(vi)	stx1a,stx2a
SAMN39735178	Extended Alberta	Alberta	2018	*	Human	G(vi)	stx1a,stx2a
SAMN39735179	Extended Alberta	Alberta	2018	*	Human	G(vi)	stx1a,stx2a
SAMN39735180	Extended Alberta	Alberta	2018	*	Human	G(vi)	stx1a,stx2a
SAMN39735181	Extended Alberta	Alberta	2018	*	Human	G(vi)	stx2a
SAMN39735182	Extended Alberta	Alberta	2018	*	Human	G(vi)	stx1a,stx2a
SAMN39735184	Extended Alberta	Alberta	2018	*	Human	G(vi)	stx1a,stx2a
SAMN39735185	Extended Alberta	Alberta	2018	*	Human	G(vi)	stx1a,stx2a
SAMN39735186	Extended Alberta	Alberta	2018	*	Human	G(vi)	stx1a,stx2a
SAMN39735187	Extended Alberta	Alberta	2018	*	Human	G(vi)	stx1a,stx2a
SAMN39735188	Extended Alberta	Alberta	2018	*	Human	G(vi)	stx1a,stx2a
SAMN39735189	Extended Alberta	Alberta	2018	*	Human	G(vi)	stx1a,stx2a
SAMN39735190	Extended Alberta	Alberta	2018	*	Human	G(vi)	stx1a,stx2a
SAMN39735191	Extended Alberta	Alberta	2018	*	Human	G(vi)	stx1a,stx2a
SAMN39735192	Extended Alberta	Alberta	2018	*	Human	G(vi)	stx1a,stx2a
SAMN39735193	Extended Alberta	Alberta	2018	*	Human	G(vi)	stx1a,stx2a
SAMN39735194	Extended Alberta	Alberta	2018	*	Human	G(vi)	stx1a,stx2a
SAMN39735195	Extended Alberta	Alberta	2018	*	Human	G(vi)	stx2a
SAMN39735196	Extended Alberta	Alberta	2018	*	Human	G(vi)	stx1a,stx2a
SAMN39735197	Extended Alberta	Alberta	2018	*	Human	G(vi)	stx1a,stx2a
SAMN39735198	Extended Alberta	Alberta	2018	*	Human	G(vi)	stx1a,stx2a
SAMN39735199	Extended Alberta	Alberta	2018	*	Human	G	stx2c
SAMN39735200	Extended Alberta	Alberta	2018	*	Human	G(vi)	stx1a,stx2a
SAMN39735201	Extended Alberta	Alberta	2018	*	Human	G(vi)	stx1a,stx2a
SAMN39735202	Extended Alberta	Alberta	2018	*	Human	G(vi)	stx1a,stx2a
SAMN39735203	Extended Alberta	Alberta	2018	*	Human	G(vi)	stx2a
SAMN39735204	Extended Alberta	Alberta	2018	*	Human	G(vi)	stx2a
SAMN39735205	Extended Alberta	Alberta	2018	*	Human	G(vi)	stx2a
SAMN39735206	Extended Alberta	Alberta	2018	*	Human	G(vi)	stx1a,stx2a
SAMN39735207	Extended Alberta	Alberta	2018	*	Human	G(vi)	stx1a,stx2a
SAMN39735208	Extended Alberta	Alberta	2018	*	Human	G(vi)	stx2a
SAMN39735209	Extended Alberta	Alberta	2018	*	Human	G(vi)	stx1a,stx2a
SAMN39735210	Extended Alberta	Alberta	2018	*	Human	G(vi)	stx2a
SAMN39735211	Extended Alberta	Alberta	2018	*	Human	G(vi)	stx1a,stx2a
SAMN39735212	Extended Alberta	Alberta	2018	*	Human	G(vi)	stx1a,stx2a
SAMN39735213	Extended Alberta	Alberta	2018	*	Human	C	stx1a,stx2c
SAMN39735214	Extended Alberta	Alberta	2019	*	Human	G(vi)	stx1a,stx2a
SAMN39735215	Extended Alberta	Alberta	2019	*	Human	G(vi)	stx1a,stx2a
SAMN39735216	Extended Alberta	Alberta	2019	*	Human	G	stx2c
SAMN39735217	Extended Alberta	Alberta	2019	*	Human	G(vi)	stx1a,stx2a
SAMN39735218	Extended Alberta	Alberta	2019	*	Human	G(vi)	stx1a,stx2a
SAMN39735219	Extended Alberta	Alberta	2019	*	Human	D	stx1a,stx2c
SAMN39735220	Extended Alberta	Alberta	2019	*	Human	G(vi)	stx1a,stx2a
SAMN39735221	Extended Alberta	Alberta	2019	*	Human	E	stx2c
SAMN39735222	Extended Alberta	Alberta	2019	*	Human	G(vi)	stx1a,stx2a
SAMN39735223	Extended Alberta	Alberta	2019	*	Human	G(vi)	stx2a
SAMN39735224	Extended Alberta	Alberta	2019	*	Human	G(vi)	stx1a,stx2a
SAMN39735225	Extended Alberta	Alberta	2019	*	Human	G(vi)	stx1a,stx2a
SAMN39735226	Extended Alberta	Alberta	2019	*	Human	G(vi)	stx1a,stx2a
SAMN39735227	Extended Alberta	Alberta	2019	*	Human	E	stx1a,stx2c
SAMN39735228	Extended Alberta	Alberta	2019	*	Human	G(vi)	stx1a,stx2a
SAMN39735229	Extended Alberta	Alberta	2019	*	Human	F	-
SAMN39735230	Extended Alberta	Alberta	2019	*	Human	G(vi)	stx1a,stx2a
SAMN39735231	Extended Alberta	Alberta	2019	*	Human	G(vi)	stx2a
SAMN39735232	Extended Alberta	Alberta	2019	*	Human	F	stx2a,stx2d
SAMN39735233	Extended Alberta	Alberta	2019	*	Human	G(vi)	stx1a,stx2a
SAMN39735234	Extended Alberta	Alberta	2019	*	Human	G(vi)	stx2a
SAMN39735235	Extended Alberta	Alberta	2019	*	Human	G(vi)	stx1a,stx2a
SAMN39735236	Extended Alberta	Alberta	2019	*	Human	G	stx2c
SAMN39735237	Extended Alberta	Alberta	2019	*	Human	G(vi)	stx2a
SAMN39735238	Extended Alberta	Alberta	2019	*	Human	G(vi)	stx2a
SAMN39735239	Extended Alberta	Alberta	2019	*	Human	G(vi)	stx1a,stx2a
SAMN39735240	Extended Alberta	Alberta	2019	*	Human	G(vi)	stx1a,stx2a
SAMN39735241	Extended Alberta	Alberta	2019	*	Human	G(vi)	stx2a
SAMN39735242	Extended Alberta	Alberta	2019	*	Human	G(vi)	stx2a
SAMN39735243	Extended Alberta	Alberta	2019	*	Human	G(vi)	stx2a
SAMN39735244	Extended Alberta	Alberta	2019	*	Human	G(vi)	stx2a
SAMN39735245	Extended Alberta	Alberta	2019	*	Human	C	stx1a,stx2c
SAMN39735246	Extended Alberta	Alberta	2019	*	Human	G(vi)	stx1a,stx2a
SAMN39735247	Extended Alberta	Alberta	2019	*	Human	G(vi)	stx2a
SAMN39735248	Extended Alberta	Alberta	2019	*	Human	G(vi)	stx2a
SAMN39735249	Extended Alberta	Alberta	2019	*	Human	E	stx1a,stx2c
SAMN39735250	Extended Alberta	Alberta	2019	*	Human	G(vi)	stx1a,stx2a
SAMN39735251	Extended Alberta	Alberta	2019	*	Human	G(vi)	stx2a
SAMN39735252	Extended Alberta	Alberta	2019	*	Human	G(vi)	stx1a,stx2a
SAMN39735253	Extended Alberta	Alberta	2019	*	Human	C	stx1a,stx2c
SAMN39735254	Extended Alberta	Alberta	2019	*	Human	G(vi)	stx1a,stx2a
SAMN39735255	Extended Alberta	Alberta	2019	*	Human	G(vi)	stx1a,stx2a
SAMN39735256	Extended Alberta	Alberta	2019	*	Human	G(vi)	stx2a
SAMN39735257	Extended Alberta	Alberta	2019	*	Human	G(vi)	stx2a
SAMN39735258	Extended Alberta	Alberta	2019	*	Human	G(vi)	stx2a
SAMN39735259	Extended Alberta	Alberta	2019	*	Human	G(vi)	stx2a
SAMN39735260	Extended Alberta	Alberta	2019	*	Human	G(vi)	stx2a
SAMN39735261	Extended Alberta	Alberta	2019	*	Human	G(vi)	stx1a,stx2a
SAMN39735262	Extended Alberta	Alberta	2019	*	Human	C	stx1a,stx2c
SAMN39735307	Extended Alberta	Alberta	2019	*	Human	G(vi)	stx1a,stx2a
SAMN39735263	Extended Alberta	Alberta	2019	*	Human	G(vi)	stx1a,stx2a
SAMN39735264	Extended Alberta	Alberta	2019	*	Human	G(vi)	stx1a,stx2a
SAMN39735265	Extended Alberta	Alberta	2019	*	Human	F	stx2a
SAMN39735266	Extended Alberta	Alberta	2019	*	Human	G(vi)	stx2a
SAMN39735267	Extended Alberta	Alberta	2019	*	Human	F	stx2a,stx2c
SAMN39735268	Extended Alberta	Alberta	2019	*	Human	F	stx2c
SAMN39735269	Extended Alberta	Alberta	2019	*	Human	G(vi)	stx1a,stx2a
SAMN39735270	Extended Alberta	Alberta	2019	*	Human	G(vi)	stx2a
SAMN39735271	Extended Alberta	Alberta	2019	*	Human	G(vi)	stx2a
SAMN39735272	Extended Alberta	Alberta	2019	*	Human	G(vi)	stx1a,stx2a
SAMN39735273	Extended Alberta	Alberta	2019	*	Human	G(vi)	stx2a
SAMN39735274	Extended Alberta	Alberta	2019	*	Human	G(vi)	stx2a
SAMN39735275	Extended Alberta	Alberta	2019	*	Human	G(vi)	stx2a
SAMN39735276	Extended Alberta	Alberta	2019	*	Human	G(vi)	stx1a,stx2a
SAMN39735277	Extended Alberta	Alberta	2019	*	Human	G(vi)	stx2a
SAMN39735278	Extended Alberta	Alberta	2019	*	Human	G(vi)	stx2a
SAMN39735279	Extended Alberta	Alberta	2019	*	Human	F	stx2a,stx2c
SAMN39735280	Extended Alberta	Alberta	2019	*	Human	G(vi)	stx1a,stx2a
SAMN39735281	Extended Alberta	Alberta	2019	*	Human	G(vi)	stx2a
SAMN39735282	Extended Alberta	Alberta	2019	*	Human	G(vi)	stx1a,stx2a
SAMN39735283	Extended Alberta	Alberta	2019	*	Human	G(vi)	stx1a,stx2a
SAMN39735284	Extended Alberta	Alberta	2019	*	Human	G(vi)	stx1a,stx2a
SAMN39735285	Extended Alberta	Alberta	2019	*	Human	G(vi)	stx1a,stx2a
SAMN39735286	Extended Alberta	Alberta	2019	*	Human	G(vi)	stx1a,stx2a
SAMN39735287	Extended Alberta	Alberta	2019	*	Human	G(vi)	stx1a,stx2a
SAMN39735288	Extended Alberta	Alberta	2019	*	Human	G(vi)	stx1a,stx2a
SAMN39735289	Extended Alberta	Alberta	2019	*	Human	G(vi)	stx1a,stx2a
SAMN39735290	Extended Alberta	Alberta	2019	*	Human	G(vi)	stx1a,stx2a
SAMN39735291	Extended Alberta	Alberta	2019	*	Human	G(vi)	stx1a,stx2a
SAMN39735292	Extended Alberta	Alberta	2019	*	Human	G(vi)	stx1a,stx2a
SAMN39735293	Extended Alberta	Alberta	2019	*	Human	D	stx1a,stx2c
SAMN39735294	Extended Alberta	Alberta	2019	*	Human	G(vi)	stx2a
SAMN39735295	Extended Alberta	Alberta	2019	*	Human	G(vi)	stx1a,stx2a
SAMN39735296	Extended Alberta	Alberta	2019	*	Human	G(vi)	stx1a,stx2a
SAMN39735297	Extended Alberta	Alberta	2019	*	Human	G(vi)	stx1a,stx2a
SAMN39735298	Extended Alberta	Alberta	2019	*	Human	G(vi)	stx1a,stx2a
SAMN39735299	Extended Alberta	Alberta	2019	*	Human	G(vi)	stx2a
SAMN39735300	Extended Alberta	Alberta	2019	*	Human	G(vi)	stx1a,stx2a
SAMN39735301	Extended Alberta	Alberta	2019	*	Human	D	stx2c
SAMN39735302	Extended Alberta	Alberta	2019	*	Human	G(vi)	stx1a,stx2a
SAMN39735303	Extended Alberta	Alberta	2019	*	Human	G(vi)	stx1a,stx2a
SAMN39735304	Extended Alberta	Alberta	2019	*	Human	G(vi)	stx1a,stx2a
SAMN30378687	Primary Alberta	Alberta	2014	5/15/2014	Cattle	G(vi)	stx1a,stx2a
SAMN30378688	Primary Alberta	Alberta	2014	5/15/2014	Cattle	G(vi)	stx1a,stx2a
SAMN30378691	Primary Alberta	Alberta	2013	5/15/2013	Cattle	G(vi)	stx1a,stx2a
SAMN30378690	Primary Alberta	Alberta	2013	5/15/2013	Cattle	G(vi)	stx1a,stx2a
SAMN30378757	Primary Alberta	Alberta	2013	5/15/2013	Cattle	G(vi)	stx1a,stx2a
SAMN30378692	Primary Alberta	Alberta	2013	5/15/2013	Cattle	G(vi)	stx1a,stx2a
SAMN30378694	Primary Alberta	Alberta	2015	5/15/2015	Cattle	G(vi)	stx1a,stx2a
SAMN30378693	Primary Alberta	Alberta	2015	5/15/2015	Cattle	D	stx1a,stx2c
SAMN30378689	Primary Alberta	Alberta	2011	2/15/2011	Cattle	G(vi)	stx1a,stx2a
SAMN30378758	Primary Alberta	Alberta	2014	6/15/2014	Cattle	G(vi)	stx2a
SAMN30378696	Primary Alberta	Alberta	2013	6/15/2013	Cattle	G(vi)	stx2a
SAMN30378695	Primary Alberta	Alberta	2013	6/15/2013	Cattle	D	stx1a,stx2c
SAMN30378697	Primary Alberta	Alberta	2014	6/15/2014	Cattle	G(vi)	stx1a,stx2a
SAMN30378699	Primary Alberta	Alberta	2013	7/15/2013	Cattle	G(vi)	stx1a,stx2a
SAMN30378760	Primary Alberta	Alberta	2013	7/15/2013	Cattle	G(vi)	stx1a,stx2a
SAMN30378698	Primary Alberta	Alberta	2011	7/15/2011	Cattle	G(vi)	stx1a,stx2a
SAMN30378759	Primary Alberta	Alberta	2011	3/15/2011	Cattle	G(vi)	stx1a,stx2a
SAMN30378761	Primary Alberta	Alberta	2011	3/15/2011	Cattle	G(vi)	stx1a,stx2a
SAMN30378700	Primary Alberta	Alberta	2013	8/15/2013	Cattle	D	stx1a
SAMN30378701	Primary Alberta	Alberta	2013	8/15/2013	Cattle	G(vi)	stx1a,stx2a
SAMN30378703	Primary Alberta	Alberta	2014	7/15/2014	Cattle	G(vi)	stx1a,stx2a
SAMN30378702	Primary Alberta	Alberta	2014	7/15/2014	Cattle	G(vi)	stx1a,stx2a
SAMN30378704	Primary Alberta	Alberta	2011	4/15/2011	Cattle	G(vi)	stx1a,stx2a
SAMN30378705	Primary Alberta	Alberta	2011	4/15/2011	Cattle	G(vi)	stx1a,stx2a
SAMN30378706	Primary Alberta	Alberta	2011	5/15/2011	Cattle	G(vi)	stx1a,stx2a
SAMN30378763	Primary Alberta	Alberta	2011	5/15/2011	Cattle	G(vi)	stx1a,stx2a
SAMN30378707	Primary Alberta	Alberta	2014	9/15/2014	Cattle	G(vi)	stx1a,stx2a
SAMN30378708	Primary Alberta	Alberta	2013	9/15/2013	Cattle	G(vi)	stx1a,stx2a
SAMN30378765	Primary Alberta	Alberta	2013	9/15/2013	Cattle	G(vi)	stx1a,stx2a
SAMN30378711	Primary Alberta	Alberta	2013	10/15/2013	Cattle	G(vi)	stx1a,stx2a
SAMN30378710	Primary Alberta	Alberta	2013	10/15/2013	Cattle	G(vi)	stx1a,stx2a
SAMN30378766	Primary Alberta	Alberta	2013	10/15/2013	Cattle	G(vi)	stx1a,stx2a
SAMN30378712	Primary Alberta	Alberta	2011	6/15/2011	Cattle	G(vi)	stx1a,stx2a
SAMN30378713	Primary Alberta	Alberta	2014	10/15/2014	Cattle	G(vi)	stx2a
SAMN30378714	Primary Alberta	Alberta	2013	10/15/2013	Cattle	G(vi)	stx1a,stx2a
SAMN30378715	Primary Alberta	Alberta	2014	10/15/2014	Cattle	B	stx2c
SAMN30378716	Primary Alberta	Alberta	2014	10/15/2014	Cattle	G(vi)	stx1a,stx2a
SAMN30378717	Primary Alberta	Alberta	2011	6/15/2011	Cattle	G(vi)	stx1a,stx2a
SAMN30378718	Primary Alberta	Alberta	2013	11/15/2013	Cattle	G(vi)	stx1a,stx2a
SAMN30378720	Primary Alberta	Alberta	2014	11/15/2014	Cattle	G(vi)	stx1a,stx2a
SAMN30378721	Primary Alberta	Alberta	2014	11/15/2014	Cattle	G(vi)	stx1a,stx2a
SAMN30378719	Primary Alberta	Alberta	2014	11/15/2014	Cattle	G(vi)	stx1a,stx2a
SAMN30378722	Primary Alberta	Alberta	2011	8/15/2011	Cattle	G(vi)	stx1a,stx2a
SAMN30378723	Primary Alberta	Alberta	2011	9/15/2011	Cattle	G(vi)	stx1a,stx2a
SAMN30378724	Primary Alberta	Alberta	2011	9/15/2011	Cattle	G(vi)	stx1a,stx2a
SAMN30378677	Primary Alberta	Alberta	2010	10/15/2010	Cattle	G(vi)	stx1a,stx2a
SAMN30378725	Primary Alberta	Alberta	2008	7/15/2008	Cattle	G(vi)	stx1a,stx2a
SAMN30378767	Primary Alberta	Alberta	2008	8/15/2008	Cattle	G(vi)	stx1a,stx2a
SAMN30378768	Primary Alberta	Alberta	2008	7/15/2008	Cattle	G(vi)	stx1a,stx2a
SAMN30378769	Primary Alberta	Alberta	2008	7/15/2008	Cattle	G(vi)	stx1a,stx2a
SAMN30378770	Primary Alberta	Alberta	2008	7/15/2008	Cattle	G(vi)	stx1a,stx2a
SAMN30378726	Primary Alberta	Alberta	2008	7/15/2008	Cattle	G(vi)	stx1a,stx2a
SAMN30378671	Primary Alberta	Alberta	2010	*	Human	G(vi)	stx2a
SAMN30378772	Primary Alberta	Alberta	2010	5/15/2010	Cattle	G(vi)	stx1a,stx2a
SAMN30378773	Primary Alberta	Alberta	2010	5/15/2010	Cattle	G(vi)	stx1a,stx2a
SAMN30378774	Primary Alberta	Alberta	2009	12/15/2009	Cattle	G(vi)	stx1a,stx2a
SAMN30378728	Primary Alberta	Alberta	2010	2/15/2010	Cattle	G(vi)	stx1a,stx2a
SAMN30378729	Primary Alberta	Alberta	2008	10/15/2008	Cattle	G(vi)	stx2a
SAMN30378777	Primary Alberta	Alberta	2008	10/15/2008	Cattle	G(vi)	stx1a,stx2a
SAMN30378730	Primary Alberta	Alberta	2008	10/15/2008	Cattle	G(vi)	stx1a,stx2a
SAMN30378731	Primary Alberta	Alberta	2010	6/15/2010	Cattle	G(vi)	stx1a,stx2a
SAMN30378779	Primary Alberta	Alberta	2010	7/15/2010	Cattle	G(vi)	stx1a,stx2a
SAMN30378780	Primary Alberta	Alberta	2010	6/15/2010	Cattle	G(vi)	stx1a,stx2a
SAMN30378736	Primary Alberta	Alberta	2009	12/15/2009	Cattle	G(vi)	stx1a,stx2a
SAMN30378737	Primary Alberta	Alberta	2010	3/15/2010	Cattle	G(vi)	stx1a,stx2a
SAMN30378784	Primary Alberta	Alberta	2010	12/15/2010	Cattle	G(vi)	stx1a,stx2a
SAMN30378785	Primary Alberta	Alberta	2010	11/15/2010	Cattle	G(vi)	stx2a
SAMN30378732	Primary Alberta	Alberta	2010	1/15/2010	Cattle	G(vi)	stx2a
SAMN30378735	Primary Alberta	Alberta	2009	12/15/2009	Cattle	G(vi)	stx1a,stx2a
SAMN30378733	Primary Alberta	Alberta	2009	11/15/2009	Cattle	G(vi)	stx1a,stx2a
SAMN30378740	Primary Alberta	Alberta	2007	8/15/2007	Cattle	G(vi)	stx1a,stx2a
SAMN30378789	Primary Alberta	Alberta	2007	8/15/2007	Cattle	G(vi)	stx1a,stx2a
SAMN30378741	Primary Alberta	Alberta	2007	9/15/2007	Cattle	G(vi)	stx1a,stx2a
SAMN30378788	Primary Alberta	Alberta	2007	7/15/2007	Cattle	G(vi)	stx1a,stx2a
SAMN30378739	Primary Alberta	Alberta	2007	7/15/2007	Cattle	G(vi)	stx1a,stx2a
SAMN30378743	Primary Alberta	Alberta	2007	9/15/2007	Cattle	G(vi)	stx1a,stx2a
SAMN30378790	Primary Alberta	Alberta	2007	5/15/2007	Cattle	G(vi)	stx1a,stx2a
SAMN30378745	Primary Alberta	Alberta	2007	12/15/2007	Cattle	G(vi)	stx1a,stx2a
SAMN30378744	Primary Alberta	Alberta	2007	12/15/2007	Cattle	G(vi)	stx1a,stx2a
SAMN30378742	Primary Alberta	Alberta	2007	6/15/2007	Cattle	G(vi)	stx1a,stx2a
SAMN30378791	Primary Alberta	Alberta	2007	6/15/2007	Cattle	G(vi)	stx1a,stx2a
SAMN30378746	Primary Alberta	Alberta	2008	8/15/2008	Cattle	G(vi)	stx1a,stx2a
SAMN30378792	Primary Alberta	Alberta	2008	8/15/2008	Cattle	G(vi)	stx1a,stx2a
SAMN30378580	Primary Alberta	Alberta	2007	*	Human	G(vi)	stx1a,stx2a
SAMN30378545	Primary Alberta	Alberta	2007	*	Human	F	stx2a
SAMN30378546	Primary Alberta	Alberta	2007	*	Human	G(vi)	stx2a
SAMN30378581	Primary Alberta	Alberta	2007	*	Human	G(vi)	stx1a,stx2a
SAMN30378547	Primary Alberta	Alberta	2007	*	Human	G(vi)	stx1a,stx2a
SAMN30378582	Primary Alberta	Alberta	2007	*	Human	G(vi)	stx1a,stx2a
SAMN30378548	Primary Alberta	Alberta	2007	*	Human	G(vi)	stx1a,stx2a
SAMN30378549	Primary Alberta	Alberta	2007	*	Human	G(vi)	stx1a,stx2a
SAMN30378550	Primary Alberta	Alberta	2007	*	Human	G(vi)	stx1a,stx2a
SAMN30378551	Primary Alberta	Alberta	2007	*	Human	G(vi)	stx1a,stx2a
SAMN30378552	Primary Alberta	Alberta	2007	*	Human	G(vi)	stx1a,stx2a
SAMN30378553	Primary Alberta	Alberta	2007	*	Human	G(vi)	stx1a,stx2a
SAMN30378554	Primary Alberta	Alberta	2007	*	Human	G(vi)	stx1a,stx2a
SAMN30378555	Primary Alberta	Alberta	2007	*	Human	G(vi)	stx1a,stx2a
SAMN30378556	Primary Alberta	Alberta	2007	*	Human	G(vi)	stx1a,stx2a
SAMN30378557	Primary Alberta	Alberta	2008	*	Human	G(vi)	stx1a,stx2a
SAMN30378558	Primary Alberta	Alberta	2008	*	Human	G(vi)	stx1a,stx2a
SAMN30378583	Primary Alberta	Alberta	2008	*	Human	G(vi)	stx1a,stx2a
SAMN30378584	Primary Alberta	Alberta	2008	*	Human	G(vi)	stx1a,stx2a
SAMN30378585	Primary Alberta	Alberta	2008	*	Human	G(vi)	stx1a,stx2a
SAMN30378586	Primary Alberta	Alberta	2008	*	Human	G(vi)	stx1a,stx2a
SAMN30378559	Primary Alberta	Alberta	2008	*	Human	G(vi)	stx1a,stx2a
SAMN30378560	Primary Alberta	Alberta	2008	*	Human	G(vi)	stx1a,stx2a
SAMN30378561	Primary Alberta	Alberta	2008	*	Human	G	stx1a,stx2c
SAMN30378587	Primary Alberta	Alberta	2008	*	Human	G(vi)	stx1a,stx2a
SAMN30378562	Primary Alberta	Alberta	2008	*	Human	G(vi)	stx1a,stx2a
SAMN30378563	Primary Alberta	Alberta	2008	*	Human	G(vi)	stx1a,stx2a
SAMN30378564	Primary Alberta	Alberta	2008	*	Human	G(vi)	stx1a,stx2a
SAMN30378588	Primary Alberta	Alberta	2008	*	Human	G(vi)	stx1a,stx2a
SAMN30378565	Primary Alberta	Alberta	2008	*	Human	G(vi)	stx1a,stx2a
SAMN30378566	Primary Alberta	Alberta	2008	*	Human	G(vi)	stx1a,stx2a
SAMN30378567	Primary Alberta	Alberta	2009	*	Human	G(vi)	stx1a,stx2a
SAMN30378589	Primary Alberta	Alberta	2009	*	Human	G(vi)	stx1a,stx2a
SAMN30378590	Primary Alberta	Alberta	2009	*	Human	G(vi)	stx1a,stx2a
SAMN30378568	Primary Alberta	Alberta	2009	*	Human	G(vi)	stx1a,stx2a
SAMN30378569	Primary Alberta	Alberta	2009	*	Human	G(vi)	stx1a,stx2a
SAMN30378591	Primary Alberta	Alberta	2009	*	Human	G(vi)	stx1a,stx2a
SAMN30378570	Primary Alberta	Alberta	2009	*	Human	G(vi)	stx1a,stx2a
SAMN30378592	Primary Alberta	Alberta	2009	*	Human	C	stx1a,stx2c
SAMN30378593	Primary Alberta	Alberta	2009	*	Human	F	stx2a
SAMN30378594	Primary Alberta	Alberta	2009	*	Human	G(vi)	stx1a,stx2a
SAMN30378595	Primary Alberta	Alberta	2009	*	Human	G(vi)	stx2a
SAMN30378596	Primary Alberta	Alberta	2009	*	Human	G(vi)	stx1a,stx2a
SAMN30378597	Primary Alberta	Alberta	2009	*	Human	G(vi)	stx1a,stx2a
SAMN30378598	Primary Alberta	Alberta	2009	*	Human	G(vi)	stx1a,stx2a
SAMN30378599	Primary Alberta	Alberta	2009	*	Human	G(vi)	stx1a,stx2a
SAMN30378600	Primary Alberta	Alberta	2010	*	Human	G(vi)	stx1a,stx2a
SAMN30378601	Primary Alberta	Alberta	2010	*	Human	F	stx2a
SAMN30378602	Primary Alberta	Alberta	2010	*	Human	G(vi)	stx1a,stx2a
SAMN30378603	Primary Alberta	Alberta	2010	*	Human	E	stx2c
SAMN30378604	Primary Alberta	Alberta	2010	*	Human	G(vi)	stx1a,stx2a
SAMN30378605	Primary Alberta	Alberta	2010	*	Human	G(vi)	stx1a,stx2a
SAMN30378606	Primary Alberta	Alberta	2010	*	Human	G(vi)	stx1a,stx2a
SAMN30378607	Primary Alberta	Alberta	2010	*	Human	G(vi)	stx1a,stx2a
SAMN30378571	Primary Alberta	Alberta	2010	*	Human	G(vi)	stx1a,stx2a
SAMN30378608	Primary Alberta	Alberta	2010	*	Human	F	stx2a
SAMN30378572	Primary Alberta	Alberta	2010	*	Human	G(vi)	stx1a,stx2a
SAMN30378573	Primary Alberta	Alberta	2010	*	Human	G(vi)	stx1a,stx2a
SAMN30378609	Primary Alberta	Alberta	2010	*	Human	G(vi)	stx2a
SAMN30378610	Primary Alberta	Alberta	2010	*	Human	G(vi)	stx1a,stx2a
SAMN30378611	Primary Alberta	Alberta	2011	*	Human	G(vi)	stx2a
SAMN30378612	Primary Alberta	Alberta	2011	*	Human	G(vi)	stx2a
SAMN30378613	Primary Alberta	Alberta	2011	*	Human	G(vi)	stx1a,stx2a
SAMN30378614	Primary Alberta	Alberta	2011	*	Human	G(vi)	stx1a,stx2a
SAMN30378615	Primary Alberta	Alberta	2011	*	Human	G(vi)	stx1a,stx2a
SAMN30378616	Primary Alberta	Alberta	2011	*	Human	G(vi)	stx2a
SAMN30378617	Primary Alberta	Alberta	2011	*	Human	G(vi)	stx1a,stx2a
SAMN30378618	Primary Alberta	Alberta	2011	*	Human	G(vi)	stx1a,stx2a
SAMN30378619	Primary Alberta	Alberta	2011	*	Human	G(vi)	stx1a,stx2a
SAMN30378620	Primary Alberta	Alberta	2011	*	Human	G(vi)	stx1a,stx2a
SAMN30378621	Primary Alberta	Alberta	2011	*	Human	G(vi)	stx2a
SAMN30378574	Primary Alberta	Alberta	2011	*	Human	G(vi)	stx1a,stx2a
SAMN30378622	Primary Alberta	Alberta	2011	*	Human	G(vi)	stx1a,stx2a
SAMN30378623	Primary Alberta	Alberta	2011	*	Human	G(vi)	stx1a,stx2a
SAMN30378624	Primary Alberta	Alberta	2011	*	Human	G(vi)	stx1a,stx2a
SAMN30378575	Primary Alberta	Alberta	2011	*	Human	G(vi)	stx1a,stx2a
SAMN30378576	Primary Alberta	Alberta	2012	*	Human	G(vi)	stx1a,stx2a
SAMN30378577	Primary Alberta	Alberta	2012	*	Human	G(vi)	stx1a,stx2a
SAMN30378578	Primary Alberta	Alberta	2012	*	Human	E	stx2c
SAMN30378625	Primary Alberta	Alberta	2013	*	Human	G(vi)	stx1a,stx2a
SAMN30378579	Primary Alberta	Alberta	2013	*	Human	G(vi)	stx1a,stx2a
SAMN30378626	Primary Alberta	Alberta	2013	*	Human	F	stx2a,stx2c
SAMN30378627	Primary Alberta	Alberta	2013	*	Human	G(vi)	stx1a,stx2a
SAMN30378628	Primary Alberta	Alberta	2013	*	Human	G(vi)	stx1a,stx2a
SAMN30378629	Primary Alberta	Alberta	2013	*	Human	G(vi)	stx1a,stx2a
SAMN30378630	Primary Alberta	Alberta	2013	*	Human	F	stx2a
SAMN30378631	Primary Alberta	Alberta	2013	*	Human	G	stx1a,stx2c
SAMN30378632	Primary Alberta	Alberta	2013	*	Human	G	stx1a,stx2c
SAMN30378633	Primary Alberta	Alberta	2013	*	Human	G(vi)	stx1a,stx2a
SAMN30378634	Primary Alberta	Alberta	2013	*	Human	G(vi)	stx1a,stx2a
SAMN30378635	Primary Alberta	Alberta	2013	*	Human	G(vi)	stx1a,stx2a
SAMN30378636	Primary Alberta	Alberta	2013	*	Human	G(vi)	stx1a,stx2a
SAMN30378637	Primary Alberta	Alberta	2013	*	Human	G(vi)	stx1a,stx2a
SAMN30378793	Primary Alberta	Alberta	2008	10/15/2008	Cattle	G(vi)	stx2a
SAMN30378794	Primary Alberta	Alberta	2008	8/15/2008	Cattle	G(vi)	stx1a,stx2a
SAMN30378638	Primary Alberta	Alberta	2014	*	Human	G(vi)	stx1a,stx2a
SAMN30378639	Primary Alberta	Alberta	2014	*	Human	G(vi)	stx2a
SAMN30378640	Primary Alberta	Alberta	2014	*	Human	G(vi)	stx2a
SAMN30378641	Primary Alberta	Alberta	2014	*	Human	G(vi)	stx2a
SAMN30378642	Primary Alberta	Alberta	2014	*	Human	G(vi)	stx2a
SAMN30378643	Primary Alberta	Alberta	2014	*	Human	G(vi)	stx1a,stx2a
SAMN30378644	Primary Alberta	Alberta	2014	*	Human	G(vi)	stx1a,stx2a
SAMN30378645	Primary Alberta	Alberta	2014	*	Human	G(vi)	stx1a,stx2a
SAMN30378646	Primary Alberta	Alberta	2014	*	Human	G(vi)	stx1a,stx2a
SAMN30378647	Primary Alberta	Alberta	2014	*	Human	G(vi)	stx1a,stx2a
SAMN30378648	Primary Alberta	Alberta	2014	*	Human	G(vi)	stx1a,stx2a
SAMN30378649	Primary Alberta	Alberta	2014	*	Human	G(vi)	stx1a,stx2a
SAMN30378650	Primary Alberta	Alberta	2014	*	Human	G(vi)	stx1a,stx2a
SAMN30378651	Primary Alberta	Alberta	2014	*	Human	F	stx2a
SAMN30378652	Primary Alberta	Alberta	2014	*	Human	F	stx2a
SAMN30378653	Primary Alberta	Alberta	2015	*	Human	F	stx2a
SAMN30378654	Primary Alberta	Alberta	2015	*	Human	G(vi)	stx1a,stx2a
SAMN30378655	Primary Alberta	Alberta	2015	*	Human	G(vi)	stx1a,stx2a
SAMN30378656	Primary Alberta	Alberta	2015	*	Human	G(vi)	stx2a
SAMN30378657	Primary Alberta	Alberta	2015	*	Human	G(vi)	stx2a
SAMN30378658	Primary Alberta	Alberta	2015	*	Human	G(vi)	stx1a,stx2a
SAMN30378659	Primary Alberta	Alberta	2015	*	Human	G(vi)	stx1a,stx2a
SAMN30378665	Primary Alberta	Alberta	2015	*	Human	F	stx2a,stx2c
SAMN30378666	Primary Alberta	Alberta	2015	*	Human	E	stx2c
SAMN30378667	Primary Alberta	Alberta	2015	*	Human	F	stx2a,stx2c
SAMN30378668	Primary Alberta	Alberta	2015	*	Human	E	stx2c
SAMN30378795	Primary Alberta	Alberta	2008	10/15/2008	Cattle	G(vi)	stx2a
SAMN12641821	USA/Global	USA	2011	***	Human	F	stx2a
SAMN12641820	USA/Global	USA	2011	***	Human	F	stx2a
SAMN12641826	USA/Global	USA	2011	***	Human	F	stx2a
SAMN13242711	USA/Global	USA	2016	***	Human	F	stx2a,stx2c
SAMN13242724	USA/Global	USA	2016	***	Human	G(vi)	stx1a,stx2a
SAMN13242731	USA/Global	USA	2016	***	Human	F	stx2a,stx2c
SAMN13242738	USA/Global	USA	2016	***	Human	F	stx2a,stx2c
SAMN13242768	USA/Global	USA	2016	***	Human	G(vi)	stx1a,stx2a
SAMN13279834	USA/Global	USA	2016	***	Human	F	stx2a,stx2c
SAMN13279881	USA/Global	USA	2016	***	Human	E	stx1a,stx2c
SAMN13279877	USA/Global	USA	2016	***	Human	G(vi)	stx1a,stx2a
SAMN13280854	USA/Global	USA	2016	***	Human	F	stx2a,stx2c
SAMN13283331	USA/Global	USA	2016	***	Human	E	stx2a,stx2c
SAMN13283346	USA/Global	USA	2016	***	Human	F	stx2a,stx2c
SAMN14113008	USA/Global	USA	2011	***	Human	F	stx2a,stx2c
SAMN14113031	USA/Global	USA	2012	***	Human	F	stx2a,stx2c
SAMN14113022	USA/Global	USA	2013	***	Human	F	stx2a,stx2c
SAMN14113027	USA/Global	USA	2012	***	Human	G(vi)	stx1a,stx2a
SAMN14114072	USA/Global	USA	2010	***	Human	F	stx2a
SAMN14114071	USA/Global	USA	2011	***	Human	F	stx2a
SAMN14114061	USA/Global	USA	2012	***	Human	F	stx2a,stx2c
SAMN14114267	USA/Global	USA	2013	***	Human	F	stx2a
SAMN14114274	USA/Global	USA	2014	***	Human	F	stx2a
SAMN14246406	USA/Global	USA	2013	***	Human	F	-
SAMN16400654	USA/Global	USA	2010	***	Human	G(vi)	stx1a,stx2a
SAMN02948036	USA/Global	USA	2013	***	Human	G(vi)	stx1a,stx2a
SAMN02918194	USA/Global	USA	2014	***	Human	F	stx2a,stx2c
SAMN22081422	USA/Global	USA	2015	***	Human	F	stx2a
SAMN22417906	USA/Global	USA	2014	***	Human	F	stx2a
SAMN22417913	USA/Global	USA	2014	***	Human	F	stx2a,stx2c
SAMN03359283	USA/Global	Global	2008	**	Human	G	-
SAMN03358697	USA/Global	Global	2007	**	Human	D	-
SAMN03358699	USA/Global	Global	2008	**	Human	C	stx1a,stx2a
SAMN03358700	USA/Global	Global	2008	**	Human	C	stx1a
SAMN03358702	USA/Global	Global	2008	**	Human	G	stx2a
SAMN27584919	USA/Global	USA	2010	***	Human	G(vi)	stx1a,stx2a
SAMN27584911	USA/Global	USA	2010	***	Human	G(vi)	stx1a,stx2a
SAMN27584915	USA/Global	USA	2016	***	Human	F	stx2a,stx2c
SAMN27584960	USA/Global	USA	2016	***	Human	G(vi)	stx2a
SAMN27620501	USA/Global	USA	2014	***	Human	G	stx1a
SAMN27763081	USA/Global	USA	2012	***	Human	F	-
SAMN27763082	USA/Global	USA	2016	***	Human	F	stx2a
SAMN03401500	USA/Global	USA	2014	***	Human	F	stx2a
SAMN03569142	USA/Global	USA	2013	***	Human	F	stx2a,stx2c
SAMN03610079	USA/Global	USA	2015	***	Human	F	stx2a,stx2c
SAMN03329673	USA/Global	USA	2014	***	Human	G(vi)	stx1a,stx2a
SAMN03754007	USA/Global	USA	2015	***	Human	F	stx2a,stx2c
SAMN04018859	USA/Global	USA	2015	***	Human	G(vi)	stx1a,stx2a
SAMN03784873	USA/Global	USA	2015	***	Human	F	stx2a
SAMN04148328	USA/Global	USA	2015	***	Human	F	stx2a,stx2c
SAMN04148317	USA/Global	USA	2015	***	Human	F	stx2a,stx2c
SAMN04335359	USA/Global	USA	2015	***	Human	F	stx2a,stx2c
SAMN04482375	USA/Global	USA	2015	***	Human	F	stx2a,stx2c
SAMN04530921	USA/Global	USA	2016	***	Human	G(vi)	stx1a,stx2a
SAMN04543174	USA/Global	USA	2016	***	Human	D	stx1a,stx2c
SAMN04529440	USA/Global	USA	2013	***	Human	F	stx2a,stx2c
SAMN04621489	USA/Global	USA	1998	**	Human	F	stx2a
SAMN04849620	USA/Global	USA	2016	***	Human	G(vi)	stx1a,stx2a
SAMN04849624	USA/Global	USA	2016	***	Human	G(vi)	stx1a,stx2a
SAMN04849854	USA/Global	USA	2016	***	Human	G(vi)	stx1a,stx2a
SAMN04868817	USA/Global	USA	2016	***	Human	G(vi)	stx1a,stx2a
SAMN04867620	USA/Global	USA	2016	***	Human	G(vi)	stx1a,stx2a
SAMN04934387	USA/Global	USA	2016	***	Human	G(vi)	stx1a,stx2a
SAMN04992961	USA/Global	USA	2015	***	Human	G(vi)	stx2a
SAMN05003731	USA/Global	USA	2016	***	Human	F	stx2a
SAMN05179986	USA/Global	USA	2016	***	Human	F	stx2a,stx2c
SAMN05017809	USA/Global	USA	2016	***	Human	G(vi)	stx1a,stx2a
SAMN00760005	USA/Global	USA	2008	**	Human	E	stx2c
SAMN05505250	USA/Global	USA	2016	***	Human	F	stx2a,stx2c
SAMN05383104	USA/Global	USA	2016	***	Human	F	stx2a
SAMN05560071	USA/Global	USA	2016	***	Human	F	stx2a
SAMN05603575	USA/Global	USA	2016	***	Human	E	stx2a
SAMN05768327	USA/Global	USA	2016	***	Human	F	stx2a
SAMN00794600	USA/Global	USA	2007	**	Human	G(vi)	stx1a
SAMN05360185	USA/Global	USA	1998	**	Human	F	stx2a
SAMN05360173	USA/Global	USA	2002	**	Human	G(vi)	stx1a,stx2a
SAMN05360146	USA/Global	USA	1998	**	Human	F	stx2a
SAMN05360201	USA/Global	USA	1999	**	Cattle	G(vi)	stx2a
SAMN05360203	USA/Global	USA	1999	**	Cattle	F	stx2a
SAMN05360207	USA/Global	USA	1999	**	Cattle	G(vi)	stx1a,stx2a
SAMN05360200	USA/Global	USA	2000	**	Cattle	G(vi)	stx1a,stx2a
SAMN05360245	USA/Global	USA	2002	**	Cattle	E	stx2c
SAMN05360158	USA/Global	USA	2000	**	Human	G(vi)	stx1a,stx2a
SAMN05360184	USA/Global	USA	1996	**	Human	G(vi)	stx1a,stx2a
SAMN05360153	USA/Global	USA	1999	**	Human	G(vi)	stx1a,stx2a
SAMN05360178	USA/Global	USA	1998	**	Human	G(vi)	stx1a,stx2a
SAMN05360183	USA/Global	USA	1996	**	Human	G(vi)	stx1a,stx2a
SAMN05360163	USA/Global	USA	2001	**	Human	G(vi)	stx1a,stx2a
SAMN05360165	USA/Global	USA	2001	**	Human	G(vi)	stx1a,stx2a
SAMN05360162	USA/Global	USA	2000	**	Human	F	stx2a
SAMN05360170	USA/Global	USA	2002	**	Human	G(vi)	stx1a,stx2a
SAMN05360172	USA/Global	USA	2002	**	Human	G(vi)	stx1a,stx2a
SAMN05360204	USA/Global	USA	1999	**	Cattle	F	stx2a
SAMN05360227	USA/Global	USA	1999	**	Cattle	G(vi)	stx1a,stx2a
SAMN05360223	USA/Global	USA	1999	**	Cattle	F	stx2a
SAMN05360224	USA/Global	USA	1999	**	Cattle	F	stx2a
SAMN05360215	USA/Global	USA	2002	**	Cattle	G	stx2c
SAMN05360191	USA/Global	USA	2002	**	Cattle	G	stx2c
SAMN05360189	USA/Global	USA	2005	**	Cattle	G(vi)	stx2a
SAMN05360199	USA/Global	USA	2000	**	Cattle	E	stx1a,stx2c
SAMN05360242	USA/Global	USA	2000	**	Cattle	E	stx1a,stx2c
SAMN05360217	USA/Global	USA	2002	**	Cattle	E	stx2c
SAMN05360214	USA/Global	USA	2002	**	Cattle	E	stx2c
SAMN05360240	USA/Global	USA	2002	**	Cattle	E	stx2c
SAMN05360221	USA/Global	USA	2002	**	Cattle	E	stx2c
SAMN05360155	USA/Global	USA	1999	**	Human	G(vi)	stx1a,stx2a
SAMN05856081	USA/Global	USA	2016	***	Human	G(vi)	stx1a,stx2a
SAMN05826222	USA/Global	USA	2016	***	Human	C	stx1a,stx2c
SAMN00808701	USA/Global	USA	2009	**	Human	F	stx2a
SAMN00808704	USA/Global	USA	2009	**	Human	F	stx2c
SAMN00808707	USA/Global	USA	2009	**	Human	F	-
SAMN00808709	USA/Global	USA	2009	**	Human	F	stx2a,stx2c
SAMN00808712	USA/Global	USA	2007	**	Human	F	stx2a,stx2c
SAMN00808720	USA/Global	USA	2000	**	Cattle	G(vi)	stx1a
SAMN05925216	USA/Global	USA	2016	***	Human	G(vi)	stx1a,stx2a
SAMN06010528	USA/Global	USA	2016	***	Human	F	stx2a,stx2c
SAMN06015092	USA/Global	USA	2016	***	Human	F	stx2a,stx2c
SAMN06049460	USA/Global	USA	2016	***	Human	F	stx2a
SAMN06045865	USA/Global	USA	2016	***	Human	G(vi)	stx1a,stx2a
SAMN06047173	USA/Global	USA	2016	***	Human	G(vi)	stx2a
SAMN06117597	USA/Global	USA	2016	***	Human	G(vi)	stx1a,stx2a
SAMN06140670	USA/Global	USA	2016	***	Human	F	stx2a,stx2c
SAMN06010533	USA/Global	USA	2016	***	Human	E	stx1a,stx2c
SAMN06246880	USA/Global	USA	2016	***	Human	F	stx2a,stx2c
SAMN06251158	USA/Global	USA	2016	***	Human	G(vi)	stx2a
SAMN06236372	USA/Global	USA	2016	***	Human	E	stx2c
SAMN06339546	USA/Global	USA	2016	***	Human	F	stx2a,stx2c
SAMN06332336	USA/Global	USA	2016	***	Human	G	stx1a
SAMN06277311	USA/Global	USA	2016	***	Human	F	stx2a,stx2c
SAMN06288289	USA/Global	USA	2016	***	Human	D	stx1a,stx2c
SAMN06282382	USA/Global	USA	2016	***	Human	E	stx2c
SAMN06346135	USA/Global	USA	2016	***	Human	F	stx2a,stx2c
SAMN06346136	USA/Global	USA	2016	***	Human	G(vi)	stx1a,stx2a
SAMN06333089	USA/Global	USA	2016	***	Human	F	stx2a,stx2c
SAMN06333090	USA/Global	USA	2016	***	Human	A	stx2c
SAMN06352111	USA/Global	USA	2016	***	Human	G(vi)	stx1a,stx2a
SAMN06456787	USA/Global	USA	2016	***	Human	E	stx1a,stx2c
SAMN06456783	USA/Global	USA	2016	***	Human	E	stx1a,stx2c
SAMN06625018	USA/Global	USA	2016	***	Human	F	stx2a
SAMN06645223	USA/Global	USA	2016	***	Human	F	stx2a,stx2c
SAMN06645220	USA/Global	USA	2016	***	Human	F	-
SAMN06332338	USA/Global	USA	2016	***	Human	G(vi)	stx1a,stx2a
SAMN07177489	USA/Global	USA	2016	***	Human	G	-
SAMN07159565	USA/Global	USA	2016	***	Human	G(vi)	stx1a,stx2a
SAMN08385479	USA/Global	USA	2015	***	Human	F	stx2a
SAMN08595248	USA/Global	USA	2016	***	Human	F	stx2a
SAMN09740109	USA/Global	USA	2014	***	Human	F	stx2c
SAMN09765953	USA/Global	Global	2010	**	Human	D	stx2c
SAMN09765993	USA/Global	Global	2013	**	Cattle	D	stx2c
SAMN09765956	USA/Global	Global	2010	**	Human	D	stx1a,stx2c
SAMN09765989	USA/Global	Global	2013	**	Cattle	D	stx2c
SAMN09765863	USA/Global	Global	2013	**	Cattle	G(vi)	stx1a,stx2a
SAMN09765929	USA/Global	Global	2008	**	Human	D	stx2c
SAMN09765928	USA/Global	Global	2008	**	Human	G	stx2c
SAMN09765927	USA/Global	Global	2008	**	Human	D	stx1a,stx2c
SAMN09765935	USA/Global	Global	2008	**	Human	G	stx2c
SAMN09765872	USA/Global	Global	2011	**	Cattle	D	stx2c
SAMN09765948	USA/Global	Global	2009	**	Human	D	stx2c
SAMN09765971	USA/Global	Global	2012	**	Human	G(vi)	stx1a,stx2a
SAMN09765978	USA/Global	Global	2010	**	Cattle	D	stx2c
SAMN09981763	USA/Global	Global	2013	**	Cattle	E	stx2c
SAMN09981764	USA/Global	Global	2013	**	Cattle	D	stx1a,stx2c
SAMN09981748	USA/Global	Global	2008	**	Cattle	D	stx1a,stx2c
SAMN09981758	USA/Global	Global	2009	**	Human	D	stx1a,stx2c
SAMN09981757	USA/Global	Global	2008	**	Human	D	stx1a,stx2c
SAMN04028613	USA/Global	Global	2008	**	Cattle	C	stx1a,stx2c
SAMN04028454	USA/Global	Global	2007	**	Cattle	G	stx2a,stx2c
SAMN04028567	USA/Global	Global	2011	**	Human	F	stx2a,stx2c
SAMN04028464	USA/Global	Global	2011	**	Cattle	C	stx1a,stx2c
SAMN04028470	USA/Global	Global	2007	**	Human	C	stx1a,stx2c
SAMN04028592	USA/Global	Global	2007	**	Human	G	stx2a
SAMN04028531	USA/Global	Global	2011	**	Human	E	stx2c
SAMN04028494	USA/Global	Global	2010	**	Human	E	stx2c
SAMN04028612	USA/Global	Global	2008	**	Cattle	C	stx1a,stx2c
SAMN04028603	USA/Global	Global	2009	**	Cattle	E	stx1a,stx2c
SAMN04028604	USA/Global	Global	2009	**	Cattle	E	stx2c
SAMN04028609	USA/Global	Global	2008	**	Cattle	C	stx1a,stx2c
SAMN04028608	USA/Global	Global	2007	**	Cattle	C	stx1a,stx2c
SAMN04028507	USA/Global	Global	2010	**	Human	G	stx2a
SAMN04028505	USA/Global	Global	2010	**	Human	G	-
SAMN04028506	USA/Global	Global	2010	**	Human	E	stx2a,stx2c
SAMN04028594	USA/Global	Global	2008	**	Human	C	stx1a,stx2c
SAMN04028596	USA/Global	Global	2009	**	Human	G	stx1a
SAMN04028595	USA/Global	Global	2008	**	Human	E	stx2c
SAMN04028600	USA/Global	Global	2008	**	Cattle	G	stx2c
SAMN04028522	USA/Global	Global	2010	**	Human	D	-
SAMN04028529	USA/Global	Global	2010	**	Human	G	stx2c
SAMN09941355	USA/Global	Global	2016	**	Cattle	E	stx2c
SAMN09941374	USA/Global	Global	2010	**	Cattle	F	stx2a,stx2c
SAMN11031735	USA/Global	USA	2016	***	Human	G(vi)	stx2a
SAMN11031753	USA/Global	USA	2016	***	Human	F	stx2a,stx2c
SAMN11672327	USA/Global	USA	2012	***	Human	G(vi)	stx1a,stx2a
SAMN11672337	USA/Global	USA	2012	***	Human	G(vi)	stx1a,stx2a
SAMN30378669	Primary Alberta	Alberta	2014	*	Human	G(vi)	stx1a,stx2a
SAMN30378796	Primary Alberta	Alberta	2008	8/15/2008	Cattle	G(vi)	stx1a,stx2a
SAMD00099613	USA/Global	Global	2013	**	Human	A	stx1a,stx2c
SAMD00495880	USA/Global	Global	2014	**	Human	F	stx2c
SAMD00495898	USA/Global	Global	2014	**	Human	F	stx2a
SAMD00495899	USA/Global	Global	2014	**	Human	F	stx2a
SAMD00495925	USA/Global	Global	2014	**	Human	F	stx2c
SAMD00495929	USA/Global	Global	2014	**	Human	F	stx2a
SAMD00495933	USA/Global	Global	2014	**	Human	F	stx2a
SAMD00496004	USA/Global	Global	2013	**	Human	F	stx2a
SAMD00496007	USA/Global	Global	2008	**	Human	F	stx2a
SAMD00496012	USA/Global	Global	2013	**	Human	F	stx2c
SAMD00496013	USA/Global	Global	2013	**	Human	F	stx2a
SAMN01036887	USA/Global	USA	2010	**	Cattle	A	stx2c
SAMN01112590	USA/Global	USA	2007	**	Human	G(vi)	stx2a
SAMN01728946	USA/Global	USA	2007	**	Cattle	B	stx2c
SAMN01728948	USA/Global	USA	2007	**	Human	F	stx2a,stx2c
SAMN01883249	USA/Global	Global	2009	**	Cattle	F	stx2a
SAMN01885532	USA/Global	USA	2012	**	Human	E	stx1a,stx2c
SAMN01885533	USA/Global	USA	2012	**	Cattle	F	-
SAMN01885534	USA/Global	USA	2012	**	Cattle	B	stx2c
SAMN01919667	USA/Global	Global	2009	**	Cattle	E	stx2c
SAMN01919739	USA/Global	Global	2008	**	Cattle	E	stx2c
SAMN02948035	USA/Global	USA	2013	***	Human	G(vi)	stx1a,stx2a
SAMN02948038	USA/Global	USA	2013	***	Human	G(vi)	stx1a,stx2a
SAMN03272073	USA/Global	USA	2014	***	Human	G(vi)	stx1a,stx2a
SAMN03272074	USA/Global	USA	2014	***	Human	G(vi)	stx1a,stx2a
SAMN03272075	USA/Global	USA	2014	***	Human	G(vi)	stx1a,stx2a
SAMN03283210	USA/Global	USA	2014	***	Human	G(vi)	stx1a,stx2a
SAMN03569143	USA/Global	USA	2013	***	Human	G(vi)	stx1a,stx2a
SAMN03763871	USA/Global	USA	2015	***	Human	G(vi)	stx2a
SAMN03976058	USA/Global	USA	2014	***	Human	G(vi)	stx1a,stx2a
SAMN03976059	USA/Global	USA	2014	***	Human	G(vi)	stx1a,stx2a
SAMN04148322	USA/Global	USA	2015	***	Human	G	stx1a,stx2a,stx2c
SAMN04148326	USA/Global	USA	2015	***	Human	G	stx1a,stx2a,stx2c
SAMN04323341	USA/Global	USA	2015	***	Human	G(vi)	stx1a,stx2a
SAMN04383535	USA/Global	USA	2015	***	Human	G(vi)	stx1a,stx2a
SAMN04482324	USA/Global	USA	2015	***	Human	G(vi)	stx1a,stx2a
SAMN04482326	USA/Global	USA	2015	***	Human	G(vi)	stx1a,stx2a
SAMN04530923	USA/Global	USA	2016	***	Human	G(vi)	stx1a,stx2a
SAMN04625556	USA/Global	USA	2010	***	Human	G(vi)	stx1a,stx2a
SAMN04849859	USA/Global	USA	2016	***	Human	G(vi)	stx1a,stx2a
SAMN04868818	USA/Global	USA	2016	***	Human	G(vi)	stx1a,stx2a
SAMN04934392	USA/Global	USA	2016	***	Human	G(vi)	stx1a,stx2a
SAMN04992962	USA/Global	USA	2015	***	Human	G(vi)	stx2a
SAMN06005808	USA/Global	USA	2012	2012-05-11	Cattle	F	stx2a,stx2c
SAMN06005809	USA/Global	USA	2012	2012-05-11	Cattle	F	stx2a,stx2c
SAMN06005810	USA/Global	USA	2012	2012-05-11	Cattle	F	stx2acd
SAMN06005811	USA/Global	USA	2012	2012-05-11	Cattle	F	stx2acd
SAMN06005813	USA/Global	USA	2012	2012-05-11	Cattle	F	stx2c
SAMN06005814	USA/Global	USA	2012	2012-05-11	Cattle	F	stx2a,stx2c
SAMN06005815	USA/Global	USA	2012	2012-05-11	Cattle	F	stx2a,stx2c
SAMN06005816	USA/Global	USA	2012	2012-05-11	Cattle	F	stx2a,stx2c
SAMN06005817	USA/Global	USA	2012	2012-05-11	Cattle	F	stx2c
SAMN06005818	USA/Global	USA	2012	2012-05-11	Cattle	F	stx2acd
SAMN06005819	USA/Global	USA	2012	2012-05-11	Cattle	F	stx2a,stx2c
SAMN06005820	USA/Global	USA	2012	2012-05-11	Cattle	F	stx2a,stx2c
SAMN06005821	USA/Global	USA	2012	2012-05-11	Cattle	F	stx2c
SAMN06005822	USA/Global	USA	2012	2012-05-11	Cattle	F	stx2c
SAMN06005823	USA/Global	USA	2012	2012-05-11	Cattle	F	stx2a,stx2c
SAMN06005824	USA/Global	USA	2012	2012-05-11	Cattle	F	stx2a,stx2c
SAMN06005825	USA/Global	USA	2012	2012-05-11	Cattle	F	stx2acd
SAMN06005827	USA/Global	USA	2013	2013-06-05	Cattle	F	stx2c
SAMN06005828	USA/Global	USA	2013	2013-04-19	Cattle	G	stx2c
SAMN06005829	USA/Global	USA	2013	2013-04-19	Cattle	G(vi)	stx1a,stx2a
SAMN06005830	USA/Global	USA	2013	2013-02-20	Cattle	G(vi)	stx1a,stx2a
SAMN06005831	USA/Global	USA	2013	2013-02-20	Cattle	G	stx2c
SAMN06005832	USA/Global	USA	2013	2013-02-20	Cattle	F	stx2a,stx2c
SAMN06005833	USA/Global	USA	2013	2013-02-14	Cattle	F	stx2a,stx2c
SAMN06005834	USA/Global	USA	2013	2013-02-14	Cattle	F	stx2a,stx2c
SAMN06005835	USA/Global	USA	2013	2013-02-13	Cattle	G(vi)	stx1a,stx2a
SAMN06005836	USA/Global	USA	2013	2013-02-13	Cattle	G(vi)	stx1a,stx2a
SAMN06005837	USA/Global	USA	2013	2013-02-13	Cattle	F	stx2a,stx2c
SAMN06005838	USA/Global	USA	2013	2013-01-09	Cattle	F	stx2a,stx2c
SAMN06005839	USA/Global	USA	2013	2013-01-09	Cattle	F	stx2a,stx2c
SAMN06005840	USA/Global	USA	2012	2012-05-11	Cattle	F	stx2c
SAMN06005841	USA/Global	USA	2012	2012-12-06	Cattle	G(vi)	stx1a,stx2a
SAMN06005845	USA/Global	USA	2012	2012-12-06	Cattle	F	stx2c
SAMN06005846	USA/Global	USA	2012	2012-12-06	Cattle	E	stx2c
SAMN06005847	USA/Global	USA	2012	2012-12-06	Cattle	E	stx2c
SAMN06005849	USA/Global	USA	2012	2012-12-06	Cattle	E	stx2c
SAMN06005850	USA/Global	USA	2012	2012-12-06	Cattle	G(vi)	stx1a,stx2a
SAMN06005851	USA/Global	USA	2012	2012-12-06	Cattle	G(vi)	stx1a,stx2a
SAMN06005852	USA/Global	USA	2012	2012-12-06	Cattle	E	stx2c
SAMN06005853	USA/Global	USA	2012	2012-12-06	Cattle	G(vi)	stx1a,stx2a
SAMN06005854	USA/Global	USA	2012	2012-12-06	Cattle	G(vi)	stx1a,stx2a
SAMN06005855	USA/Global	USA	2012	2012-12-06	Cattle	E	stx2c
SAMN06005856	USA/Global	USA	2012	2012-12-06	Cattle	E	stx2c
SAMN06005859	USA/Global	USA	2012	2012-12-06	Cattle	E	stx2c
SAMN06005860	USA/Global	USA	2012	2012-12-06	Cattle	E	stx2c
SAMN06005863	USA/Global	USA	2012	2012-12-06	Cattle	E	stx2c
SAMN06005864	USA/Global	USA	2012	2012-12-06	Cattle	E	stx2c
SAMN06005866	USA/Global	USA	2012	2012-12-06	Cattle	E	stx2c
SAMN06005869	USA/Global	USA	2012	2012-12-06	Cattle	E	stx2c
SAMN06005871	USA/Global	USA	2012	2012-05-24	Cattle	F	-
SAMN06005873	USA/Global	USA	2012	2012-05-24	Cattle	F	stx2a,stx2c
SAMN06005875	USA/Global	USA	2012	2012-05-15	Cattle	F	stx2c
SAMN06005878	USA/Global	USA	2012	2012-05-11	Cattle	F	stx2a
SAMN06005879	USA/Global	USA	2012	2012-05-11	Cattle	F	stx2a
SAMN06005880	USA/Global	USA	2012	2012-05-11	Cattle	F	stx2a,stx2c
SAMN06005881	USA/Global	USA	2012	2012-05-11	Cattle	F	stx2a
SAMN06005882	USA/Global	USA	2012	2012-05-11	Cattle	F	stx2a,stx2c
SAMN06005883	USA/Global	USA	2012	2012-05-11	Cattle	F	stx2a,stx2c
SAMN06005884	USA/Global	USA	2012	2012-05-11	Cattle	F	stx2a,stx2c
SAMN06005885	USA/Global	USA	2012	2012-05-11	Cattle	F	stx2acd
SAMN06005886	USA/Global	USA	2012	2012-05-11	Cattle	F	stx2a,stx2c
SAMN06005887	USA/Global	USA	2012	2012-05-11	Cattle	F	stx2a,stx2c
SAMN06005888	USA/Global	USA	2012	2012-05-11	Cattle	F	stx2a,stx2c
SAMN06005889	USA/Global	USA	2012	2012-05-11	Cattle	F	stx2a
SAMN06005890	USA/Global	USA	2012	2012-05-11	Cattle	F	stx2a,stx2c
SAMN06005891	USA/Global	USA	2012	2012-05-11	Cattle	F	stx2a,stx2c
SAMN06005892	USA/Global	USA	2012	2012-05-11	Cattle	F	stx2c
SAMN06072280	USA/Global	USA	2016	***	Human	G(vi)	stx1a,stx2a
SAMN06113547	USA/Global	USA	2016	***	Human	G(vi)	stx1a,stx2a
SAMN06117601	USA/Global	USA	2016	***	Human	G(vi)	stx2a
SAMN06129856	USA/Global	USA	2016	***	Human	G	-
SAMN06198648	USA/Global	USA	2016	***	Human	G(vi)	stx1a,stx2a
SAMN06198664	USA/Global	USA	2016	***	Human	G(vi)	stx1a,stx2a
SAMN06204079	USA/Global	USA	2016	***	Human	G(vi)	stx1a,stx2a
SAMN06236756	USA/Global	USA	2015	***	Human	G(vi)	stx1a,stx2a
SAMN06236757	USA/Global	USA	2015	***	Human	G(vi)	stx1a,stx2a
SAMN06283844	USA/Global	USA	2017	***	Human	G	stx2c
SAMN06350873	USA/Global	USA	2017	***	Human	G(vi)	stx1a,stx2a
SAMN06607337	USA/Global	USA	2017	***	Human	G(vi)	stx2a
SAMN06617358	USA/Global	USA	2016	***	Human	G(vi)	stx1a,stx2a
SAMN06624385	USA/Global	USA	2017	***	Human	G(vi)	stx2a
SAMN06680626	USA/Global	USA	2017	***	Human	G(vi)	stx1a,stx2a
SAMN06754697	USA/Global	USA	2017	***	Human	G(vi)	stx2a
SAMN06854884	USA/Global	USA	2017	***	Human	G(vi)	stx2a
SAMN07138317	USA/Global	USA	2017	***	Human	G(vi)	stx2a
SAMN07299018	USA/Global	USA	2017	***	Human	G(vi)	stx2a
SAMN07299020	USA/Global	USA	2017	***	Human	G(vi)	stx2a
SAMN07304740	USA/Global	USA	2017	***	Human	G(vi)	stx1a,stx2a
SAMN07317921	USA/Global	USA	2017	***	Human	G(vi)	stx1a,stx2a
SAMN07342361	USA/Global	USA	2017	***	Human	G(vi)	stx1a,stx2a
SAMN07342365	USA/Global	USA	2017	***	Human	G(vi)	stx1a,stx2a
SAMN07358415	USA/Global	USA	2017	***	Human	G	stx2c
SAMN07358455	USA/Global	USA	2017	***	Human	G(vi)	stx1a,stx2a
SAMN07375739	USA/Global	USA	2017	***	Human	G(vi)	stx1a,stx2a
SAMN07409422	USA/Global	USA	2017	***	Human	G(vi)	stx1a,stx2a
SAMN07409424	USA/Global	USA	2017	***	Human	G(vi)	stx1a,stx2a
SAMN07414128	USA/Global	USA	2017	***	Human	G(vi)	stx1a,stx2a
SAMN07434377	USA/Global	USA	2017	***	Human	G(vi)	stx1a,stx2a
SAMN07450730	USA/Global	USA	2017	***	Human	G(vi)	stx1a,stx2a
SAMN07455892	USA/Global	USA	2017	***	Human	G(vi)	stx2a
SAMN07498454	USA/Global	USA	2017	***	Human	G(vi)	stx1a,stx2a
SAMN07505014	USA/Global	USA	2017	***	Human	G	stx2c
SAMN07520066	USA/Global	USA	2017	***	Human	G(vi)	stx1a,stx2a
SAMN07535982	USA/Global	USA	2017	***	Human	G	stx2a
SAMN07567565	USA/Global	USA	2017	***	Human	G(vi)	stx1a,stx2a
SAMN07568599	USA/Global	USA	2017	***	Human	G(vi)	stx1a,stx2a
SAMN07571963	USA/Global	USA	2017	***	Human	G(vi)	stx1a,stx2a
SAMN07597638	USA/Global	USA	2017	***	Human	G(vi)	stx1a,stx2a
SAMN07629894	USA/Global	USA	2017	***	Human	G(vi)	stx1a,stx2a
SAMN07638474	USA/Global	USA	2016	***	Human	G(vi)	stx1a,stx2a
SAMN07646017	USA/Global	USA	2017	***	Human	G(vi)	stx2a
SAMN07646019	USA/Global	USA	2017	***	Human	G(vi)	stx2a
SAMN07679399	USA/Global	USA	2017	***	Human	G(vi)	stx1a,stx2a
SAMN07679400	USA/Global	USA	2017	***	Human	G(vi)	stx1a,stx2a
SAMN07679406	USA/Global	USA	2017	***	Human	G(vi)	stx1a,stx2a
SAMN07693592	USA/Global	USA	2017	***	Human	G(vi)	stx1a,stx2a
SAMN07693606	USA/Global	USA	2017	***	Human	G(vi)	stx1a,stx2a
SAMN07816712	USA/Global	USA	2017	***	Human	G(vi)	stx1a,stx2a
SAMN07964821	USA/Global	USA	2017	***	Human	G(vi)	stx1a,stx2a
SAMN07977273	USA/Global	USA	2017	***	Human	G(vi)	stx1a,stx2a
SAMN08016890	USA/Global	USA	2017	***	Human	G(vi)	stx1a,stx2a
SAMN08114796	USA/Global	USA	2017	***	Human	G(vi)	stx1a,stx2a
SAMN08130386	USA/Global	USA	2017	***	Human	G(vi)	stx1a,stx2a
SAMN08136953	USA/Global	USA	2017	***	Human	G(vi)	stx1a,stx2a
SAMN08200292	USA/Global	USA	2017	***	Human	G(vi)	stx1a,stx2a
SAMN08297723	USA/Global	USA	2017	***	Human	G(vi)	stx1a,stx2a
SAMN08332016	USA/Global	USA	2017	***	Human	G(vi)	stx2a
SAMN08349275	USA/Global	USA	2017	***	Human	G(vi)	stx2a
SAMN08377128	USA/Global	USA	2018	***	Human	G(vi)	stx1a,stx2a
SAMN08513271	USA/Global	USA	2017	***	Human	G(vi)	stx2a
SAMN08558978	USA/Global	USA	2018	***	Human	G(vi)	stx1a,stx2a
SAMN08559006	USA/Global	USA	2017	***	Human	G(vi)	stx1a,stx2a
SAMN08743347	USA/Global	USA	2018	***	Human	G(vi)	stx1a,stx2a
SAMN08773840	USA/Global	USA	2012	***	Human	G(vi)	stx1a,stx2a
SAMN08773841	USA/Global	USA	2012	***	Human	G(vi)	stx1a,stx2a
SAMN08795542	USA/Global	USA	2018	***	Human	G(vi)	stx2a
SAMN08941079	USA/Global	USA	2018	***	Human	G	stx2a,stx2c
SAMN08941085	USA/Global	USA	2018	***	Human	G(vi)	stx1a,stx2a
SAMN08963224	USA/Global	USA	2018	***	Human	G(vi)	stx1a,stx2a
SAMN09012076	USA/Global	USA	2018	***	Human	G	stx2a,stx2c
SAMN09012085	USA/Global	USA	2018	***	Human	G	stx2a,stx2c
SAMN09229882	USA/Global	USA	2018	***	Human	G(vi)	stx1a,stx2a
SAMN09289788	USA/Global	USA	2018	***	Human	G(vi)	stx1a,stx2a
SAMN09294388	USA/Global	USA	2018	***	Human	G(vi)	stx1a,stx2a
SAMN09375720	USA/Global	USA	2018	***	Human	G	stx2c
SAMN09405453	USA/Global	USA	2018	***	Human	G(vi)	stx1a,stx2a
SAMN09428919	USA/Global	USA	2017	***	Human	G(vi)	stx2a
SAMN09464691	USA/Global	USA	2018	***	Human	G(vi)	stx1a,stx2a
SAMN09464701	USA/Global	USA	2018	***	Human	G(vi)	stx1a,stx2a
SAMN09474690	USA/Global	USA	2018	***	Human	G(vi)	stx1a,stx2a
SAMN09622861	USA/Global	USA	2018	***	Human	G(vi)	stx1a,stx2a
SAMN09635666	USA/Global	USA	2018	***	Human	G(vi)	stx1a,stx2a
SAMN09637009	USA/Global	USA	2018	***	Human	G(vi)	stx2a
SAMN09691725	USA/Global	USA	2018	***	Human	G(vi)	stx1a,stx2a
SAMN09691769	USA/Global	USA	2012	***	Human	G(vi)	stx1a,stx2a
SAMN09691901	USA/Global	USA	2018	***	Human	G(vi)	stx1a,stx2a
SAMN09779796	USA/Global	USA	2018	***	Human	G(vi)	stx1a,stx2a
SAMN09787757	USA/Global	USA	2018	***	Human	G(vi)	stx1a,stx2a
SAMN09878807	USA/Global	USA	2018	***	Human	G(vi)	stx1a,stx2a
SAMN09878835	USA/Global	USA	2018	***	Human	G(vi)	stx1a,stx2a
SAMN09910475	USA/Global	USA	2018	***	Human	G(vi)	stx1a,stx2a
SAMN10055971	USA/Global	USA	2018	***	Human	G(vi)	stx2a
SAMN10056005	USA/Global	USA	2018	***	Human	G(vi)	stx2a
SAMN10093044	USA/Global	USA	2018	***	Human	G(vi)	stx2a
SAMN10112157	USA/Global	USA	2018	***	Human	G(vi)	stx1a,stx2a
SAMN10112282	USA/Global	USA	2018	***	Human	G(vi)	stx1a,stx2a
SAMN10112335	USA/Global	USA	2018	***	Human	G(vi)	stx2a
SAMN10139065	USA/Global	USA	2018	***	Human	G(vi)	stx1a,stx2a
SAMN10139133	USA/Global	USA	2018	***	Human	G(vi)	stx2a
SAMN10144099	USA/Global	USA	2018	***	Human	G	stx2c
SAMN10163262	USA/Global	USA	2018	***	Human	G(vi)	stx2a
SAMN10170546	USA/Global	USA	2018	***	Human	G(vi)	stx1a,stx2a
SAMN10227580	USA/Global	USA	2018	***	Human	G(vi)	stx1a,stx2a
SAMN10227587	USA/Global	USA	2018	***	Human	G(vi)	stx2a
SAMN10227590	USA/Global	USA	2018	***	Human	G(vi)	stx1a,stx2a
SAMN10230763	USA/Global	USA	2018	***	Human	G(vi)	stx1a,stx2a
SAMN10230823	USA/Global	USA	2018	***	Human	G(vi)	stx1a,stx2a
SAMN10267426	USA/Global	USA	2018	***	Human	G(vi)	stx1a,stx2a
SAMN10293194	USA/Global	USA	2018	***	Human	G	stx2c
SAMN10293197	USA/Global	USA	2018	***	Human	G(vi)	stx2a
SAMN10293216	USA/Global	USA	2018	***	Human	G(vi)	stx1a,stx2a
SAMN10352940	USA/Global	USA	2018	***	Human	G(vi)	stx1a,stx2a
SAMN10353479	USA/Global	USA	2018	***	Human	G	stx2c
SAMN10355051	USA/Global	USA	2018	***	Human	G(vi)	stx2a
SAMN10391755	USA/Global	USA	2018	***	Human	G	stx2c
SAMN10396661	USA/Global	USA	2018	***	Human	G(vi)	stx2a
SAMN10432018	USA/Global	USA	2018	***	Human	G(vi)	stx1a,stx2a
SAMN10432022	USA/Global	USA	2018	***	Human	G(vi)	stx1a,stx2a
SAMN10432026	USA/Global	USA	2018	***	Human	G	stx2c
SAMN10432051	USA/Global	USA	2018	***	Human	G(vi)	stx1a,stx2a
SAMN10432067	USA/Global	USA	2018	***	Human	G(vi)	stx2a
SAMN10432145	USA/Global	USA	2018	***	Human	G(vi)	stx1a,stx2a
SAMN10432149	USA/Global	USA	2018	***	Human	G(vi)	stx1a,stx2a
SAMN10434913	USA/Global	USA	2018	***	Human	G(vi)	stx1a,stx2a
SAMN10436976	USA/Global	USA	2018	***	Human	G(vi)	stx1a,stx2a
SAMN10436994	USA/Global	USA	2018	***	Human	G(vi)	stx2a
SAMN10436996	USA/Global	USA	2018	***	Human	G(vi)	stx1a,stx2a
SAMN10492532	USA/Global	USA	2018	***	Human	G(vi)	stx1a,stx2a
SAMN10492725	USA/Global	USA	2018	***	Human	G(vi)	stx1a,stx2a
SAMN10518473	USA/Global	USA	2018	***	Human	G(vi)	stx1a,stx2a
SAMN10590160	USA/Global	USA	2018	***	Human	G(vi)	stx1a,stx2a
SAMN10590163	USA/Global	USA	2018	***	Human	G(vi)	stx2a
SAMN10618811	USA/Global	USA	2018	***	Human	G(vi)	stx2a
SAMN10618819	USA/Global	USA	2017	***	Human	G(vi)	stx1a,stx2a
SAMN10774396	USA/Global	USA	2018	***	Human	G(vi)	stx2a
SAMN10774497	USA/Global	USA	2018	***	Human	G	stx2c
SAMN10774550	USA/Global	USA	2018	***	Human	G(vi)	stx1a,stx2a
SAMN10774635	USA/Global	USA	2017	***	Human	G	stx2c
SAMN10774637	USA/Global	USA	2018	***	Human	G(vi)	stx2a
SAMN10853256	USA/Global	USA	2018	***	Human	G(vi)	stx2a
SAMN10853359	USA/Global	USA	2018	***	Human	G(vi)	stx2a
SAMN10853419	USA/Global	USA	2018	***	Human	G(vi)	stx1a,stx2a
SAMN10873205	USA/Global	USA	2019	***	Human	G(vi)	stx1a,stx2a
SAMN11029068	USA/Global	USA	2019	***	Human	G(vi)	stx1a,stx2a
SAMN11031715	USA/Global	USA	2016	***	Human	G(vi)	stx1a,stx2a
SAMN11031729	USA/Global	USA	2016	***	Human	G(vi)	stx1a,stx2a
SAMN11192046	USA/Global	USA	2019	***	Human	G(vi)	stx1a,stx2a
SAMN11416006	USA/Global	USA	2019	***	Human	G(vi)	stx1a,stx2a
SAMN11418767	USA/Global	USA	2019	***	Human	G	stx2c
SAMN11585253	USA/Global	USA	2019	***	Human	G(vi)	stx1a,stx2a
SAMN11603829	USA/Global	USA	2019	***	Human	G(vi)	stx1a,stx2a
SAMN11604085	USA/Global	USA	2019	***	Human	G(vi)	stx2a
SAMN11640752	USA/Global	USA	2019	***	Human	G(vi)	stx1a,stx2a
SAMN11654842	USA/Global	USA	2019	***	Human	G(vi)	stx2a
SAMN11672309	USA/Global	USA	2012	***	Human	G(vi)	stx1a,stx2a
SAMN11672314	USA/Global	USA	2013	***	Human	G(vi)	stx1a,stx2a
SAMN11672325	USA/Global	USA	2012	***	Human	G(vi)	stx1a,stx2a
SAMN11672326	USA/Global	USA	2012	***	Human	G(vi)	stx1a,stx2a
SAMN11672329	USA/Global	USA	2012	***	Human	G(vi)	stx1a,stx2a
SAMN11672341	USA/Global	USA	2012	***	Human	G(vi)	stx1a,stx2a
SAMN11672351	USA/Global	USA	2013	***	Human	G(vi)	stx1a,stx2a
SAMN11761244	USA/Global	USA	2019	***	Human	G(vi)	stx1a,stx2a
SAMN11761728	USA/Global	USA	2019	***	Human	G(vi)	stx1a,stx2a
SAMN11761731	USA/Global	USA	2019	***	Human	G(vi)	stx1a,stx2a
SAMN12059894	USA/Global	USA	2019	***	Human	G(vi)	stx1a,stx2a
SAMN12214368	USA/Global	USA	2019	***	Human	G(vi)	stx1a,stx2a
SAMN12230494	USA/Global	USA	2019	***	Human	G(vi)	stx1a,stx2a
SAMN12310343	USA/Global	USA	2018	***	Human	G	stx1a,stx2a
SAMN12345166	USA/Global	USA	2019	***	Human	G(vi)	stx1a,stx2a
SAMN12498591	USA/Global	USA	2019	***	Human	G(vi)	stx1a,stx2a
SAMN12499626	USA/Global	USA	2019	***	Human	G(vi)	stx1a,stx2a
SAMN12547326	USA/Global	USA	2019	***	Human	G(vi)	stx1a,stx2a
SAMN12573410	USA/Global	USA	2019	***	Human	G(vi)	stx1a,stx2a
SAMN12591156	USA/Global	USA	2019	***	Human	G(vi)	stx1a,stx2a
SAMN12644783	USA/Global	USA	2019	***	Human	G(vi)	stx1a,stx2a
SAMN12685361	USA/Global	USA	2019	***	Human	G(vi)	stx1a,stx2a
SAMN12687055	USA/Global	USA	2019	***	Human	G(vi)	stx1a,stx2a
SAMN12736685	USA/Global	USA	2019	***	Human	G(vi)	stx1a,stx2a
SAMN12738116	USA/Global	USA	2019	***	Human	G	stx2a,stx2c
SAMN12798685	USA/Global	USA	2019	***	Human	G	-
SAMN12799195	USA/Global	USA	2019	***	Human	G(vi)	stx2a
SAMN12825316	USA/Global	USA	2019	***	Human	G(vi)	stx1a,stx2a
SAMN12903515	USA/Global	USA	2019	***	Human	G(vi)	stx1a,stx2a
SAMN12906826	USA/Global	USA	2019	***	Human	G(vi)	stx1a,stx2a
SAMN12906993	USA/Global	USA	2019	***	Human	G(vi)	stx1a,stx2a
SAMN12906997	USA/Global	USA	2019	***	Human	G(vi)	stx1a,stx2a
SAMN12907000	USA/Global	USA	2019	***	Human	G(vi)	stx1a,stx2a
SAMN12913567	USA/Global	USA	2019	***	Human	G(vi)	stx1a,stx2a
SAMN13042243	USA/Global	USA	2019	***	Human	G(vi)	stx1a,stx2a
SAMN13071961	USA/Global	USA	2019	***	Human	G(vi)	stx1a,stx2a
SAMN13107878	USA/Global	USA	2019	***	Human	G(vi)	stx1a,stx2a
SAMN13169245	USA/Global	USA	2019	***	Human	G(vi)	stx1a,stx2a
SAMN13191633	USA/Global	Global	2013	**	Human	D	stx1a,stx2c
SAMN13198265	USA/Global	USA	2019	***	Human	G(vi)	stx1a,stx2a
SAMN13242764	USA/Global	USA	2016	***	Human	G	stx2c
SAMN13280850	USA/Global	USA	2016	***	Human	G(vi)	stx1a,stx2a
SAMN13326091	USA/Global	USA	2019	***	Human	G(vi)	stx1a,stx2a
SAMN13327247	USA/Global	USA	2019	***	Human	G(vi)	stx2a
SAMN13344032	USA/Global	USA	2019	***	Human	G(vi)	stx2a
SAMN13349059	USA/Global	USA	2019	***	Human	G(vi)	stx2a
SAMN13353513	USA/Global	USA	2019	***	Human	G(vi)	stx2a
SAMN13353514	USA/Global	USA	2019	***	Human	G(vi)	stx2a
SAMN13380546	USA/Global	USA	2019	***	Human	G(vi)	stx2a
SAMN13383156	USA/Global	USA	2019	***	Human	G(vi)	stx2a
SAMN13384256	USA/Global	USA	2019	***	Human	G(vi)	stx2a
SAMN13384349	USA/Global	USA	2019	***	Human	G(vi)	stx2a
SAMN13386025	USA/Global	USA	2019	***	Human	G(vi)	stx2a
SAMN13387921	USA/Global	USA	2019	***	Human	G(vi)	stx2a
SAMN13389933	USA/Global	USA	2019	***	Human	G(vi)	stx2a
SAMN13412147	USA/Global	USA	2019	***	Human	G(vi)	stx2a
SAMN13446256	USA/Global	USA	2019	***	Human	G(vi)	stx1a,stx2a
SAMN13476898	USA/Global	USA	2019	***	Human	G(vi)	stx2a
SAMN13488998	USA/Global	USA	2019	***	Human	G(vi)	stx2a
SAMN13505811	USA/Global	USA	2019	***	Human	G(vi)	stx2a
SAMN13512603	USA/Global	USA	2019	***	Human	G(vi)	stx2a
SAMN13513877	USA/Global	USA	2019	***	Human	G(vi)	stx1a,stx2a
SAMN13513893	USA/Global	USA	2019	***	Human	G(vi)	stx1a,stx2a
SAMN13623032	USA/Global	USA	2019	***	Human	G(vi)	stx2a
SAMN13657029	USA/Global	USA	2019	***	Human	G(vi)	stx2a
SAMN13673460	USA/Global	USA	2019	***	Human	G(vi)	stx1a,stx2a
SAMN13676449	USA/Global	USA	2019	***	Human	G(vi)	stx1a,stx2a
SAMN13685838	USA/Global	USA	2019	***	Human	G(vi)	stx1a,stx2a
SAMN13740914	USA/Global	USA	2019	***	Human	G(vi)	stx2a
SAMN13869583	USA/Global	USA	2019	***	Human	G(vi)	stx2a
SAMN14113001	USA/Global	USA	2013	***	Human	G(vi)	stx1a,stx2a
SAMN14113002	USA/Global	USA	2011	***	Human	G(vi)	stx1a,stx2a
SAMN14113004	USA/Global	USA	2011	***	Human	G(vi)	stx1a,stx2a
SAMN14113005	USA/Global	USA	2011	***	Human	G(vi)	stx1a,stx2a
SAMN14113017	USA/Global	USA	2013	***	Human	G(vi)	stx1a,stx2a
SAMN14113026	USA/Global	USA	2012	***	Human	G(vi)	stx1a,stx2a
SAMN14113693	USA/Global	USA	2019	***	Human	G(vi)	stx2a
SAMN14246404	USA/Global	USA	2014	***	Human	G(vi)	stx2a
SAMN16400645	USA/Global	USA	2012	***	Human	G(vi)	stx1a,stx2a
SAMN16400653	USA/Global	USA	2012	***	Human	G(vi)	stx1a,stx2a
SAMN16400655	USA/Global	USA	2012	***	Human	G(vi)	stx1a,stx2a
SAMN16400659	USA/Global	USA	2011	***	Human	G	stx2c
SAMN16400660	USA/Global	USA	2012	***	Human	G(vi)	stx1a,stx2a
SAMN16435613	USA/Global	USA	2011	***	Human	G(vi)	stx1a,stx2a
SAMN16435619	USA/Global	USA	2011	***	Human	G	stx2c
SAMN17822335	USA/Global	USA	2019	***	Human	G(vi)	stx1a,stx2a
SAMN17822361	USA/Global	USA	2019	***	Human	G(vi)	stx1a,stx2a
SAMN17844177	USA/Global	USA	2019	***	Human	G(vi)	stx1a,stx2a
SAMN18490961	USA/Global	USA	2019	***	Human	G(vi)	stx1a,stx2a
SAMN18490964	USA/Global	USA	2019	***	Human	G(vi)	stx1a,stx2a
SAMN18492328	USA/Global	USA	2019	***	Human	G(vi)	stx1a,stx2a
SAMN18492354	USA/Global	USA	2019	***	Human	G(vi)	stx1a,stx2a
SAMN19243197	USA/Global	USA	2019	***	Human	G(vi)	stx1a,stx2a
SAMN20437390	USA/Global	USA	2013	**	Human	G(vi)	stx1a,stx2a
SAMN27584961	USA/Global	USA	2016	***	Human	G(vi)	stx1a,stx2a
SAMN27620507	USA/Global	USA	2015	***	Human	G(vi)	stx1a,stx2a
*	Case dates available from Alberta Health Services upon appropriate ethics approval and data agreement
**	Specific dates not available; imputed as July 15 of the given year
***	Case dates available from PulseNet upon appropriate approval

## Sheet: Documentation
Accession Number	NCBI Biosample accession ID
Analaysis Set	Analysis isolate used in; see Figure 1 of manuscript
Locale	Geographic source of isolate
Year	Year of isolation
Sampling Date	Date of isolation if known and available; July 15 used if missing
Species	Species isolate originated from
Clade	Clade determined based on SNPs defined in Strachan et al. 2015 Sci Rep; 5: 14145
stx Profile	Shiga toxin genes as determined by STECFinder
